# Supplementary material for: Mobile applications for skin cancer detection are vulnerable to physical camera-based adversarial attacks
Source: Research Square preprint supplement (doi:10.21203/rs.3.rs-5934018/v1), 2025-04-15
Supplement: Supplementary file 1 [file 81c74cda7c8445e29d7092e8.xlsx]

## Sheet: DermoApp
DermoApp
NV(baseline; red indicates MEL)					MEL(baseline; red indicates NV)						NV(densenet201)					MEL(densenet201)
image id	trial 1	trial 2	trial 3	predicted	image id	trial 1	trial 2	trial 3	predicted		image id	trial 1	trial 2	trial 3	predicted	image id	trial 1	trial 2	trial 3	predicted
1	99.5	99.61	99.65	NV	1	99	98	96	MEL		1	99.4	99.91	99.88	NV	1	91	97	81	MEL
2	99.5	99.47	99.3	NV	2	99	95	98	MEL		2	99.45	99.94	99.67	NV	2	90	99.33	99.48	NV
3	99.21	99.43	99.58	NV	3	99	99	94	MEL		3	99.96	99.97	99.97	NV	3	91	94	87	MEL
4	99.54	99.8	99.27	NV	4	98	99	98	MEL		4	90	81	99.27	MEL	4	83	99.46	99.23	NV
5	99.33	99.79	99.91	NV	5	92	87	96	MEL		5	99.94	99.99	100	NV	5	99.96	99.96	99.82	NV
6	99.84	99.85	99.93	NV	6	88	98	95	MEL		6	99.47	99.41	99.37	NV	6	98	96	97	MEL
7	97	95	99	MEL	7	99.27	99.26	99.87	NV		7	99.52	87	80	MEL	7	99.42	99.3	99.52	NV
8	99.8	99.98	99.99	NV	8	99	99	97	MEL		8	99.98	99.99	99.98	NV	8	99	99	100	MEL
9	99.45	99.31	99.23	NV	9	86	97	95	MEL		9	96.6	83	99.71	MEL	9	99.71	99.26	99.3	NV
10	99.99	99.89	99.93	NV	10	93	85	98	MEL		10	99.62	99.7	99.62	NV	10	99.4	99.31	99.32	NV
11	99.22	99.27	99.31	NV	11	95	94	98	MEL		11	99.81	99.32	99.81	NV	11	99.68	96	99.27	NV
12	99.31	99.28	99.22	NV	12	85	92	98	MEL		12	99.77	99.93	99.84	NV	12	83	86	83	MEL
13	99.32	99.38	99.63	NV	13	93	94	95	MEL		13	99.92	99.88	99.7	NV	13	91	89	89	MEL
14	99.45	99.36	99.22	NV	14	97	94	96	MEL		14	99.98	100	99.97	NV	14	99.92	99.64	99.76	NV
15	99.85	99.42	99.95	NV	15	95	88	99	MEL		15	100	99.99	99.99	NV	15	99.52	99.45	86	NV
16	99.8	99.92	99.98	NV	16	94	99.28	99.64	NV		16	99.98	99.99	99.99	NV	16	99.97	99.94	99.97	NV
17	99.52	99.63	99.49	NV	17	95	98	95	MEL		17	99.66	99.66	99.93	NV	17	85	82	99.5	NV
18	99.45	99.85	99.48	NV	18	99	97	95	MEL		18	99.97	99.96	99.99	NV	18	94	90	98	MEL
19	99.87	99.62	99.79	NV	19	97	95	88	MEL		19	99.99	99.97	100	NV	19	89	95	87	MEL
20	99.52	99.4	99.35	NV	20	95	98	96	MEL		20	99.95	99.5	99.96	NV	20	99.36	86	86	NV
21	99	99	98	MEL	21	100	99	99	MEL		21	81	81	99.52	MEL	21	100	96	100	MEL
22	100	99.87	99.96	NV	22	96	92	90	MEL		22	99.9	99.79	99.72	NV	22	99.82	99.91	99.97	NV
23	99.78	99.77	99.88	NV	23	91	91	98	MEL		23	100	100	100	NV	23	99.97	99.91	99.92	NV
24	99.37	99.47	99.72	NV	24	99	98	99	MEL		24	99.56	99.48	99.91	NV	24	96	85	98	MEL
25	99.29	99.29	97	MEL	25	95	87	86	MEL		25	99.27	99.52	88	MEL	25	99.59	99.29	99.23	NV
26	99.66	99.55	99.62	NV	26	99.44	99.74	99.83	NV		26	99.65	99.89	99.85	NV	26	99.28	99.38	99.54	NV
27	99.61	99.37	99.64	NV	27	99	98	97	MEL		27	99.32	99.34	94	MEL	27	99.4	99.69	99.41	MEL
28	99.22	99.21	99.39	NV	28	99.99	99.93	99.98	NV		28	99.64	99.93	99.8	NV	28	99.99	99.98	99.97	NV
29	99.97	99.69	99.76	NV	29	99	100	100	MEL		29	99.95	100	99.73	NV	29	99.21	99.23	93	NV
30	99.97	99.93	99.82	NV	30	98	97	89	MEL		30	99.99	99.99	100	NV	30	99.77	99.5	99.21	NV
31	99.78	99.25	99.28	NV	31	93	81	94	MEL		31	99.97	99.73	99.92	NV	31	99.84	99.67	99.77	NV
32	99.84	99.91	99.67	NV	32	84	81	92	MEL		32	99.95	99.78	99.96	NV	32	99.23	99.34	99.47	NV
33	99.25	99.33	99.49	NV	33	88	99.74	99.99	NV		33	85	94	96	MEL	33	99.89	99.94	100	NV
34	99.75	99.96	99.98	NV	34	99.95	99.83	99.97	NV		34	99.97	99.98	99.95	NV	34	99.97	100	99.99	NV
35	99.99	100	99.98	NV	35	99.63	99.42	99.83	NV		35	99.99	100	99.99	NV	35	100	99.96	99.92	NV
36	99.88	99.96	99.99	NV	36	90	92	91	MEL		36	99.99	99.95	99.99	NV	36	91	93	89	MEL
37	99.62	99.42	99.24	NV	37	86	92	99	MEL		37	99.63	99.93	99.61	NV	37	99.45	82	99.29	NV
38	99.51	99.53	99.94	NV	38	99	96	87	MEL		38	99.89	99.99	99.96	NV	38	99.31	84	99.53	NV
39	99.4	99.73	99.21	NV	39	99.96	99.59	99.97	MEL		39	99.88	99.89	99.86	NV	39	100	100	100	NV
40	99.92	99.74	99.99	NV	40	99.46	82	99.26	NV		40	99.99	99.99	100	NV	40	99.55	99.7	99.38	NV
41	99.92	99.92	99.99	NV	41	93	96	97	MEL		41	100	100	100	NV	41	92	96	99.22	NV
42	99.67	99.94	99.75	NV	42	88	98	89	MEL		42	99.99	99.99	99.99	NV	42	99.95	99.28	99.44	NV
43	99.42	99.39	99.52	NV	43	99.32	82	86	NV		43	99.97	99.93	99.99	NV	43	99.34	99.29	99.99	NV
44	99.27	99.31	99.42	NV	44	98	100	99	MEL		44	99.88	99.87	99.53	NV	44	99.25	99.34	99.65	NV
45	99.38	99.89	99.81	NV	45	87	86	90	MEL		45	99.63	99.83	99.61	NV	45	99.93	99.96	99.96	NV
46	99.68	99.53	99.56	NV	46	88	95	86	MEL		46	99.99	100	99.99	NV	46	99.45	99.61	99.41	NV
47	97	90	98	MEL	47	99.59	99.61	99.63	NV		47	99.99	100	99.99	NV	47	99.91	99.98	99.97	NV
48	99.53	99.59	99.42	NV	48	99	93	99	MEL		48	100	99.99	100	NV	48	98	97	99.24	NV
49	99.88	99.96	99.92	NV	49	99.59	99.93	96	NV		49	99.45	99.8	99.32	NV	49	94	95	95	MEL
50	99.31	99.67	99.45	NV	50	94	99	99	MEL		50	99.23	99.35	99.46	NV	50	99.64	99.49	91	NV
					51	86	90	88	MEL							51	99.25	99.25	99.26	NV
					52	88	98	100	MEL							52	99	96	97	MEL
					53	99.21	95	81	NV							53	99.25	99.25	99.47	NV
					54	97	99	99	MEL							54	98	96	97	MEL
					55	94	98	85	MEL							55	88	99.7	99.22	NV
					56	94	98.78	99.83	NV							56	99.29	99.4	99.44	NV
					57	99.68	99.38	99.41	NV							57	99.94	99.7	99.91	NV
					58	99.34	99.39	99.32	MEL							58	99.72	99.71	99.45	NV
					59	99.91	99.71	99.69	NV							59	99.76	99.39	99.42	NV
					60	97	96	95	MEL							60	99.43	97	99.25	NV
					61	100	99.92	99.99	NV							61	100	99.94	100	NV
					62	96	99.21	93	NV							62	99.36	99.49	99.77	NV
					63	99	96	96	MEL							63	98	98	94	MEL
					64	89	94	97	MEL							64	84	96	99.43	NV
					65	86	95	99.24	NV							65	99.46	86	99.44	NV
					66	96	90	84	MEL							66	99.41	99.43	99.4	MEL
					67	99.34	80	92	NV							67	99.86	99.89	99.4	NV
					68	99.38	99.8	99.49	NV							68	100	100	100	NV
					69	99.53	99.57	99.47	NV							69	99.37	99.73	99.83	NV
					70	88	90	85	MEL							70	99.3	99.29	99.24	NV
					71	99.95	99.95	99.95	NV							71	99.97	99.93	99.79	NV
					72	99.51	99.26	99.47	NV							72	83	99.25	99.5	NV
					73	94	95	93	MEL							73	83	99.48	99.78	NV
					74	98	90	92	MEL							74	99.26	99.38	99.41	NV
					75	92	88	87	MEL							75	99.32	99.69	99.73	NV
					76	99.83	99.96	99.97	NV							76	99.98	99.87	100	NV
					77	94	98	92	MEL							77	99.6	99.84	99.77	NV
					78	80	96	80	MEL							78	99.37	99.81	99.36	NV
					79	93	87	93	MEL							79	92	88	91	MEL
					80	99.37	99.45	99.27	NV							80	99.65	99.41	99.62	NV
					81	90	99.53	99.41	NV							81	99.46	99.6	99.51	NV
					82	88	99.62	99.71	NV							82	99.83	99.85	99.73	NV
					83	94	94	92	MEL							83	99.21	99.58	93	NV
					84	99.32	99.52	86	NV							84	99.45	99.35	99.54	NV
					85	96	99.35	91	NV							85	99.42	99.79	99.83	NV
					86	92	90	93	MEL							86	96	97	93	MEL
					87	94	99	98	MEL							87	89	95	93	MEL
					88	99.69	99.66	99.33	NV							88	99.56	99.35	99.41	NV
					89	99.76	99.67	99.72	NV							89	99.61	99.5	99.53	NV
					90	99	98	92	MEL							90	99.54	82	99.62	NV
					91	97	94	97	MEL							91	88	93	85	MEL
					92	89	96	93	MEL							92	95	93	85	MEL
					93	99.97	99.82	99.82	NV							93	100	100	100	NV
					94	98	94	88	MEL							94	99.64	99.25	99.29	NV
					95	99.37	94	99.57	NV							95	99.95	99.96	99.91	NV
					96	98	96	85	MEL							96	93	90	98	MEL
					97	99	97	86	MEL							97	87	86	99.7	NV
					98	83	82	83	MEL							98	99.96	99.89	99.95	NV
					99	99	98	98	MEL							99	99.81	92	86	NV
					100	99	99	92	MEL							100	99.74	99.81	99.22	NV
NV(res18)					MEL(res18)						NV(res50)					MEL(res50)
image id	trial 1	trial 2	trial 3	predicted	image id	trial 1	trial 2	trial 3	predicted		image id	trial 1	trial 2	trial 3	predicted	image id	trial 1	trial 2	trial 3	predicted
1	99.82	99.42	99.72	NV	1	99.2			NV		1	99.72	99.2	99.47	NV	1	85	99.25		NV
2	99.93	99.92	99.71	NV	2	99.22			NV		2	99.86	99.97	99.75	NV	2	86	99.27		NV
3	99.99	99.97	99.95	NV	3	99.44			NV		3	99.99	99.98	100	NV	3	99.31			NV
4	99.56	99.33	99.35	NV	4	99.34			NV		4	99.24	83		MEL	4	99.34			NV
5	100	100	100	NV	5	99.99			NV		5	100	100	100	NV	5	99.77			NV
6	99.8	99.85	99.43	NV	6	97	97	92	MEL		6	99.6	84		MEL	6	98	97	97	MEL
7	99.46	99.85	99.24	NV	7	99.31			NV		7	86			MEL	7	85	83	94	MEL
8	99.89	99.85	99.98	NV	8	99	98	92	MEL		8	99.94	99.91	99.94	NV	8	99	99	99	MEL
9	99.43	99.23	99.41	NV	9	99.69			NV		9	99.39	99.33	84	MEL	9	99.63			NV
10	99.62	99.83	99.82	NV	10	99.27			NV		10	99.4	99.57	99.46	NV	10	99.47			NV
11	99.91	99.7	99.65	NV	11	99.53			NV		11	84			MEL	11	85	99.9		NV
12	99.86	99.63	99.66	NV	12	99.41			NV		12	99.99	99.92	99.97	NV	12	99.41			MEL
13	99.77	99.93	99.89	NV	13	92	95	93	MEL		13	99.99	99.94	99.99	NV	13	92	93	96	MEL
14	99.95	99.99	99.98	NV	14	99.62			NV		14	99.99	99.7	99.98	NV	14	99.96			NV
15	100	100	99.95	NV	15	99.56			NV		15	99.95	99.97	99.99	NV	15	99.36			NV
16	99.96	99.96	99.88	NV	16	99.98			NV		16	99.98	99.94	99.76	NV	16	99.94			NV
17	99.93	99.95	99.95	NV	17	99.71			NV		17	99.86	100	99.95	NV	17	99.44			NV
18	99.99	99.94	99.95	NV	18	93	95	97	MEL		18	99.75	99.93	99.86	NV	18	91	83	85	MEL
19	99.98	99.93	99.93	NV	19	94	86	99.3	NV		19	99.99	99.99	100	NV	19	99.21			NV
20	99.7	99.84	99.96	NV	20	89	99.42		NV		20	99.8	99.96	99.98	NV	20	92	87	81	MEL
21	99.27	99.24	84	MEL	21	98	99	98	MEL		21	99.22	99.96	87	MEL	21	99	99	99	MEL
22	99.87	99.38	99.75	NV	22	99.88			NV		22	99.76	99.87	99.67	NV	22	99.87			NV
23	100	100	100	NV	23	99.85			NV		23	100	100	100	NV	23	99.81			NV
24	99.4	99.91	99.94	NV	24	84	99.24		NV		24	99.48	99.9	99.74	NV	24	81	89	90	MEL
25	90			MEL	25	99.39			NV		25	82			MEL	25	99.79			NV
26	99.64	99.81	99.87	NV	26	99.79			NV		26	99.55	99.78	99.57	NV	26	99.39			NV
27	99.67	99.44	99.33	NV	27	99.26			NV		27	99.73	99.43	99.37	NV	27	86	99.34		NV
28	99.98	99.98	99.98	NV	28	99.99			NV		28	99.87	99.42	99.51	NV	28	99.94			NV
29	99.99	99.99	100	NV	29	99.36			NV		29	99.99	99.9	99.92	NV	29	94	91	97	MEL
30	99.99	100	99.99	NV	30	99.21			NV		30	99.99	99.98	99.99	NV	30	99.36			NV
31	99.99	99.85	99.92	NV	31	99.34			NV		31	99.97	100	99.99	NV	31	99.39			NV
32	99.95	99.97	99.99	NV	32	99.52			NV		32	99.87	99.93	99.89	NV	32	99.2			NV
33	94			MEL	33	99.93			NV		33	96			MEL	33	99.91			NV
34	99.96	99.97	99.98	NV	34	99.99			NV		34	99.97	99.89	99.97	NV	34	99.99			NV
35	99.99	99.97	99.99	NV	35	100			NV		35	100	100	99.98	NV	35	99.97			NV
36	99.93	99.96	99.84	NV	36	98	90	86	MEL		36	99.9	99.96	99.92	NV	36	84	99.29		NV
37	99.66	99.59	99.86	NV	37	99.45			NV		37	99.24	99.42	99.35	NV	37	99.22			NV
38	99.86	99.94	99.68	NV	38	99.43			NV		38	99.92	99.98	99.84	NV	38	99.48			NV
39	99.97	99.91	100	NV	39	99.99			NV		39	99.85	99.85	99.85	NV	39	99.95			NV
40	100	100	99.99	NV	40	99.46			NV		40	99.99	99.99	100	NV	40	99.87			NV
41	100	99.99	100	NV	41	97	80	93	MEL		41	100	100	100	NV	41	99.37			NV
42	99.99	99.92	99.89	NV	42	99.47			NV		42	99.99	99.98	99.98	NV	42	99.6			NV
43	99.94	99.98	99.99	NV	43	99.48			NV		43	99.86	99.83	99.89	NV	43	99.3			NV
44	99.9	100	100	NV	44	96	86	95	MEL		44	99.99	99.9	100	NV	44	96	97	80	MEL
45	99.94	99.53	99.52	NV	45	99.99			NV		45	99.81	99.38	99.75	NV	45	99.96			NV
46	99.99	99.95	99.91	NV	46	99.29			NV		46	100	99.99	99.99	NV	46	83	99.23		NV
47	99.99	99.97	99.95	NV	47	99.98			NV		47	99.89	99.97	99.98	NV	47	99.93			NV
48	100	99.99	99.99	NV	48	92	85	99.46	NV		48	99.98	99.99	99.99	NV	48	99.25			NV
49	99.73	99.71	99.67	NV	49	98	95	84	MEL		49	99.55	99.51	99.9	NV	49	96	88	89	MEL
50	99.8	99.91	99.47	NV	50	99.52			MEL		50	99.96	99.64	99.57	NV	50	81	82	99.34	NV
					51	86	85	99.55	NV							51	95	90	87	MEL
					52	98	99	99	MEL							52	98	99	90	MEL
					53	99.54			NV							53	99.83			NV
					54	99	95	99	MEL							54	92	97	97	MEL
					55	99.33			NV							55	99.32			NV
					56	99.3			NV							56	87	81	91	MEL
					57	99.98			NV							57	99.93			NV
					58	99.5			NV							58	87	99.27		NV
					59	99.33			NV							59	99.58			NV
					60	93	84	87	MEL							60	91	84	99.26	NV
					61	100			NV							61	99.96			NV
					62	99.76			NV							62	93	85	87	MEL
					63	94	82	86	MEL							63	97	99.24		NV
					64	99.29			NV							64	90	99.46		NV
					65	99.61			NV							65	99.89			NV
					66	93	99.3		NV							66	92	99.32		NV
					67	99.44			NV							67	99.27			NV
					68	100			NV							68	100			NV
					69	99.79			NV							69	99.58			NV
					70	99.27			NV							70	99.47			NV
					71	99.79			NV							71	99.82			NV
					72	99.61			NV							72	99.47			NV
					73	99.7			NV							73	99.35			NV
					74	99.66			NV							74	99.83			NV
					75	92	99.5		NV							75	99.83			NV
					76	99.96			NV							76	99.89			NV
					77	99.81			NV							77	99.53			NV
					78	99.71			NV							78	99.85			NV
					79	99.25			NV							79	99.24			NV
					80	99.93			NV							80	99.48			NV
					81	99.89			NV							81	99.83			NV
					82	99.85			NV							82	99.91			NV
					83	99.31			NV							83	82	99.27		NV
					84	99.74			NV							84	99.67			NV
					85	99.69			NV							85	99.97			NV
					86	96	91	89	MEL							86	89	91	86	MEL
					87	97	93	95	MEL							87	97	85	95	MEL
					88	99.71			NV							88	99.57			NV
					89	99.33			NV							89	84	83	91	MEL
					90	99.7			NV							90	99.58			NV
					91	99.31			NV							91	99.3			NV
					92	99.4			NV							92	99.39			NV
					93	100			NV							93	99.99			NV
					94	88	83	99.61	NV							94	99.3			NV
					95	99.95			NV							95	99.46			NV
					96	95	80	83	MEL							96	93	99.25		NV
					97	91	99.42		NV							97	87	81	99.37	NV
					98	99.97			NV							98	99.69			NV
					99	99.33			NV							99	96	91	81	MEL
					100	99.54			NV							100	99.33			NV
NV(vgg16)					MEL(vgg16)						NV(densenet121)					MEL(densenet121)
image id	trial 1	trial 2	trial 3	predicted	image id	trial 1	trial 2	trial 3	predicted		image id	trial 1	trial 2	trial 3	predicted	image id	trial 1	trial 2	trial 3	predicted
1	99.36	94		NV	1	99.22			NV		1	99.68	88		MEL	1	93	92	94	MEL
2	99.95	99.96	99.95	NV	2	99.69			NV		2	99.89	99.91	99.96	NV	2	96	99.7		NV
3	99.52	99.8	99.96	NV	3	96	99.26		NV		3	99.96	99.94	99.97	NV	3	90	96	94	MEL
4	99.46	99.42	99.69	NV	4	99.23			NV		4	99.77	99.62	99.25	NV	4	90	94.11		NV
5	100	100	100	NV	5	99.96			NV		5	100	100	100	NV	5	99.97			NV
6	99.72	99.22	99.64	NV	6	98	96	97	MEL		6	99.98	100	99.91	NV	6	94	97	98	MEL
7	99.3	99.29	99.48	NV	7	99.36			NV		7	99.26	99.41	83	MEL	7	98	88	92	MEL
8	99.88	99.93	99.96	NV	8	99	100	99	MEL		8	99.94	99.82	99.96	NV	8	100	90	90	MEL
9	99.28	99.84	99.99	NV	9	99.52			NV		9	85			MEL	9	99.91			NV
10	99.85	99.89	99.94	NV	10	99.26			NV		10	99.64	99.54	99.27	NV	10	99.9			NV
11	99.62	99.89	82	MEL	11	99.72			NV		11	80			MEL	11	99.62			NV
12	100	99.95	99.87	NV	12	99.56			NV		12	99.26	99.39	85	MEL	12	92	92	83	MEL
13	99.89	99.93	99.76	NV	13	95	95	82	MEL		13	99.58	99.54	99.82	NV	13	96	89	96	MEL
14	99.99	99.95	99.93	NV	14	99.93			NV		14	99.65	99.85	99.88	NV	14	99.27			NV
15	99.99	99.98	99.84	NV	15	99.35			NV		15	99.95	99.85	99.94	NV	15	85	99.42		NV
16	99.97	99.86	99.81	NV	16	99.91			NV		16	99.92	99.78	99.99	NV	16	99.81			NV
17	99.94	99.96	99.96	NV	17	99.47			NV		17	99.53	99.59	99.64	NV	17	81	92	99.27	NV
18	99.89	99.95	99.88	NV	18	99	85	89	MEL		18	99.81	99.91	99.94	NV	18	95	94	97	MEL
19	99.96	99.99	99.99	NV	19	99.26			NV		19	99.98	99.9	99.9	NV	19	98	95	91	MEL
20	99.96	99.74	99.96	NV	20	93	88	99.25	NV		20	99.58	99.29	99.67	NV	20	92	94	97	MEL
21	90			MEL	21	99	99	99	MEL		21	99.32	86		MEL	21	99	97	99	MEL
22	99.86	99.75	99.81	NV	22	99.61			NV		22	99.55	81		MEL	22	99.38			NV
23	100	100	100	NV	23	99.68			NV		23	100	99.99	100	NV	23	99.9			NV
24	99.61	99.81	99.53	NV	24	98	96	88	MEL		24	99.67	99.64	99.86	NV	24	99.26			NV
25	85			MEL	25	82	99.45		NV		25	99.94	99.3	95	MEL	25	94	99.26		NV
26	99.96	99.62	99.88	NV	26	99.48			NV		26	99.38	99.78	99.8	NV	26	86	84	89	MEL
27	80			MEL	27	83	99.49		NV		27	91			MEL	27	81	99.47		NV
28	99.89	99.95	99.95	NV	28	99.99			NV		28	99.98	99.99	99.98	NV	28	99.95			NV
29	99.97	99.99	99.95	NV	29	95	91	99.23	NV		29	99.94	99.95	99.98	NV	29	99.25			NV
30	99.99	100	99.99	NV	30	99.44			NV		30	99.99	99.98	99.99	NV	30	99.24			NV
31	99.94	100	99.89	NV	31	99.24			NV		31	99.87	99.89	99.82	NV	31	94	99.24		NV
32	99.79	99.84	99.95	NV	32	91	82	99.26	NV		32	99.89	99.49	99.65	NV	32	99.42			NV
33	88			MEL	33	99.99			NV		33	95			MEL	33	99.93			NV
34	99.97	99.97	99.98	NV	34	99.99			NV		34	99.95	99.96	99.94	NV	34	99.99			NV
35	100	100	100	NV	35	99.99			NV		35	99.99	99.99	100	NV	35	99.94			NV
36	99.95	99.87	99.82	NV	36	99.65			NV		36	99.95	99.88	99.51	NV	36	95	96	93	MEL
37	99.39	99.21	99.35	NV	37	99.26			NV		37	81			MEL	37	99.57			NV
38	99.98	99.97	99.96	NV	38	99.33			NV		38	99.93	99.66	99.91	NV	38	91	99.32		NV
39	99.77	99.76	99.75	NV	39	99.99			NV		39	99.97	99.86	99.31	NV	39	99.92			NV
40	99.91	99.99	99.99	NV	40	99.68			NV		40	99.98	99.95	99.94	NV	40	99.58			NV
41	99.99	99.99	100	NV	41	95	83	96	MEL		41	99.99	99.92	99.99	NV	41	93	94	89	MEL
42	99.93	99.95	99.95	NV	42	94	99.63		NV		42	99.99	99.97	99.9	NV	42	99.26			NV
43	99.95	99.91	99.95	NV	43	99.63			NV		43	99.81	99.95	99.92	NV	43	97	95	99.55	NV
44	99.8	100	100	NV	44	91	99.23		NV		44	99.78	100	99.7	NV	44	98	89	97	MEL
45	99.37	99.58	99.54	NV	45	99.93			NV		45	99.29	99.28	99.54	NV	45	99.5			NV
46	98	100	99.99	NV	46	83	80	99.38	NV		46	99.9	99.92	99.76	NV	46	99.25			NV
47	99.98	99.99	99.99	NV	47	99.97			NV		47	99.96	99.98	99.94	NV	47	99.71			NV
48	99.98	99.99	100	NV	48	99.45			NV		48	100	99.99	99.97	NV	48	94	92	92	MEL
49	99.82	99.75	99.89	NV	49	98	94	96	MEL		49	99.95	99.93	99.74	NV	49	99.31			NV
50	99.39	99.49	99.47	NV	50	99.26			NV		50	99.82	99.61	99.36	NV	50	91	97	96	MEL
					51	99.21			NV							51	99.51			NV
					52	97	98	83	MEL							52	99	100	98	MEL
					53	99.38			NV							53	99.55			NV
					54	98	96	98	MEL							54	99	99	99	MEL
					55	86	99.38		NV							55	99.32			NV
					56	83	99.51		NV							56	82	99.53		NV
					57	99.84			NV							57	99.57			NV
					58	99.57			NV							58	99.93			NV
					59	99.24			NV							59	85	99.35		NV
					60	87	99.24		NV							60	97	97	96	MEL
					61	99.99			NV							61	99.99			NV
					62	99.41			NV							62	99.35			NV
					63	95	96	95	MEL							63	96	96	97	MEL
					64	99.2			NV							64	99.36			NV
					65	99.52			NV							65	99.81			NV
					66	95	95	99.26	NV							66	91	90	86	MEL
					67	80	99.23		NV							67	99.26			NV
					68	100			NV							68	99.99			NV
					69	99.67			NV							69	99.6			NV
					70	85	99.45		NV							70	99.23			NV
					71	99.78			NV							71	99.98			NV
					72	99.34			NV							72	90	99.26		NV
					73	99.27			NV							73	99.54			NV
					74	99.67			NV							74	99.38			NV
					75	99.68			NV							75	88	87	91	MEL
					76	99.97			NV							76	99.91			NV
					77	99.7			NV							77	88	99.46		NV
					78	99.52			NV							78	99.29			NV
					79	84	81	83	MEL							79	99.2			NV
					80	99.69			NV							80	99.48			NV
					81	99.81			NV							81	99.42			NV
					82	99.93			NV							82	99.37			NV
					83	99.44			NV							83	99.32			NV
					84	99.59			NV							84	99.39			NV
					85	99.97			NV							85	99.58			NV
					86	95	93	99.22	MEL							86	94	93	88	MEL
					87	94	84	99	MEL							87	96	94	93	MEL
					88	99.81			NV							88	99.27			NV
					89	99.38			NV							89	88	82	88	MEL
					90	87	99.3		NV							90	99.2			NV
					91	99.23			NV							91	88	98	99.27	NV
					92	82	99.34		NV							92	99.24			NV
					93	100			NV							93	99.99			NV
					94	99.74			NV							94	87	88	88	MEL
					95	99.9			NV							95	99.91			NV
					96	99.4			NV							96	91	95	96	MEL
					97	91	83	99.33	NV							97	92	99.56		NV
					98	99.95			NV							98	99.74			NV
					99	93	90	81	MEL							99	89	95	91	MEL
					100	99.47			NV							100	85	87	88	MEL
NV(ViT_base)					MEL(ViT_base)						NV(ViT_small)					MEL(ViT_small)
image id	trial 1	trial 2	trial 3	predicted	image id	trial 1	trial 2	trial 3	predicted		image id	trial 1	trial 2	trial 3	predicted	image id	trial 1	trial 2	trial 3	predicted
1	99.74	99.67	99.91	NV	1	92	95	94	MEL		1	99.25	99.58	99.73	NV	1	99.22			NV
2	99.77	99.77	99.96	NV	2	99.75			NV		2	99.75	99.9	99.7	NV	2	95	80	99.66	NV
3	99.95	99.99	99.99	NV	3	99.45			NV		3	99.98	99.98	99.99	NV	3	99.34			NV
4	99.87	86		MEL	4	99.52			NV		4	99.79	99.64	99.48	NV	4	99.22			NV
5	100	99.99	100	NV	5	99.98			NV		5	100	99.99	99.99	NV	5	99.89			NV
6	100	99.66	99.99	NV	6	92	92	96	MEL		6	99.79	99.99	99.96	NV	6	98	97	95	MEL
7	99.61	99.22	84	MEL	7	99.24			NV		7	99.47	99.56	87	MEL	7	99.96			NV
8	99.96	99.9	99.97	NV	8	99	94	99	MEL		8	99.94	99.87	99.95	NV	8	98	99	99	MEL
9	99.71	99.75	99.65	NV	9	99.64			NV		9	99.32	99.43	99.21	NV	9	99.8			NV
10	99.49	99.51	99.6	NV	10	99.32			NV		10	99.75	99.26	99.44	NV	10	99.42			NV
11	99.62	99.37	99.93	NV	11	97	99.47		NV		11	99.63	99.26	99.27	NV	11	99.84			NV
12	99.71	99.99	99.83	NV	12	99.6			NV		12	99.3	99.26	99.63	NV	12	99.25			NV
13	99.87	99.88	99.57	NV	13	95	97	95	MEL		13	99.51	99.73	99.48	NV	13	94	92	86	MEL
14	99.89	99.85	99.99	NV	14	99.65			NV		14	99.98	99.91	99.95	NV	14	99.91			NV
15	99.95	99.99	99.87	NV	15	99.59			NV		15	99.96	99.91	99.82	NV	15	99.82			NV
16	100	99.97	99.98	NV	16	99.87			NV		16	99.62	99.91	99.97	NV	16	99.9			NV
17	99.76	99.93	99.79	NV	17	99.41			NV		17	99.74	99.72	99.67	NV	17	99.43			NV
18	99.92	99.93	100	NV	18	91	81	95	MEL		18	99.78	99.88	99.83	NV	18	91	89	94	MEL
19	100	100	100	NV	19	93	99.24		NV		19	99.99	99.78	99.94	NV	19	95	87	91	MEL
20	99.72	99.7	99.74	NV	20	99.37			NV		20	99.78	99.59	99.74	NV	20	96	99.36		NV
21	99.59	99.31	99.37	NV	21	90	95	99	MEL		21	99.31	99.24	99.33	NV	21	98	98	99	MEL
22	99.5	99.54	87	MEL	22	99.97			NV		22	99.4	99.38	99.67	NV	22	99.69			NV
23	100	100	100	NV	23	99.94			NV		23	99.98	99.99	100	NV	23	99.46			NV
24	99.62	99.81	99.71	NV	24	99.24			NV		24	99.51	99.78	99.95	NV	24	94	96	88	MEL
25	99.54	99.72	99.68	NV	25	99.25			NV		25	99.34	99.63	99.34	NV	25	99.69			NV
26	99.8	99.82	99.65	NV	26	99.66			NV		26	99.69	99.43	99.27	NV	26	99.67			NV
27	99.39	99.53	99.57	NV	27	82	99.29		NV		27	88			MEL	27	99.23			NV
28	99.97	99.99	99.99	NV	28	99.81			NV		28	99.98	99.87	99.77	NV	28	99.89			NV
29	99.98	99.96	99.79	NV	29	81	99.32		NV		29	99.72	99.94	99.97	NV	29	88	99.24		NV
30	99.99	100	100	NV	30	99.29			NV		30	99.98	99.98	99.99	NV	30	99.57			NV
31	99.95	99.95	99.99	NV	31	99.54			NV		31	99.96	99.92	99.97	NV	31	99.22			NV
32	99.97	99.81	99.93	NV	32	99.24			NV		32	99.45	99.68	99.96	NV	32	99.32			NV
33	91			MEL	33	99.68			NV		33	95			MEL	33	99.39			NV
34	99.89	99.99	99.97	NV	34	99.99			NV		34	99.94	99.99	99.97	NV	34	99.99			NV
35	99.99	99.99	99.98	NV	35	99.9			NV		35	99.99	100	100	NV	35	99.62			NV
36	99.93	99.96	99.99	NV	36	88	93	88	MEL		36	99.95	99.95	99.97	NV	36	92	96	99.32	NV
37	99.53	99.79	99.29	NV	37	99.35			NV		37	99.54	99.29	99.47	NV	37	91	99.47		NV
38	99.69	99.3	99.49	NV	38	99.64			NV		38	99.98	99.99	99.93	NV	38	99.56			NV
39	99.79	99.85	99.8	NV	39	99.99			NV		39	99.43	99.52	99.22	NV	39	99.79			NV
40	99.99	99.98	99.99	NV	40	99.77			NV		40	99.9	99.93	99.96	NV	40	99.54			NV
41	100	100	100	NV	41	87	99.2		NV		41	100	100	100	NV	41	96	96	94	MEL
42	99.97	99.98	99.99	NV	42	99.22			NV		42	99.95	99.98	99.98	NV	42	99.7			NV
43	99.88	99.98	99.92	NV	43	99.22			NV		43	99.93	99.98	99.79	NV	43	99.33			NV
44	99.99	100	99.96	NV	44	98	96	97	MEL		44	99.98	99.87	99.99	NV	44	99.25			NV
45	99.84	99.66	99.87	NV	45	99.99			NV		45	99.6	99.21	99.67	NV	45	99.78			NV
46	99.97	100	99.98	NV	46	99.45			NV		46	99.55	99.99	99.91	NV	46	93	99.32		NV
47	95	100	99.99	NV	47	99.97			NV		47	99.99	99.95	99.76	NV	47	99.45			NV
48	100	100	99.98	NV	48	99.44			NV		48	100	100	99.96	NV	48	99.36			NV
49	99.58	99.79	99.6	NV	49	99.38			NV		49	99.86	99.85	99.61	NV	49	99.2			NV
50	99.92	99.84	99.32	NV	50	85	95	99.25	NV		50	99.73	99.8	99.91	NV	50	87	80	93	MEL
					51	99.51			NV							51	99.37			NV
					52	96	89	93	MEL							52	99	98	99	MEL
					53	99.71			NV							53	99.43			NV
					54	97	99	96	MEL							54	94	97	98	MEL
					55	99.92			NV							55	99.43			NV
					56	99.71			NV							56	99.34			NV
					57	99.99			NV							57	99.51			NV
					58	99.83			NV							58	88	99.5		NV
					59	99.21			NV							59	99.52			NV
					60	98	91	97	MEL							60	98	98	94	MEL
					61	100			NV							61	100			NV
					62	99.99			NV							62	99.66			NV
					63	99.24			NV							63	84	84	94	MEL
					64	99.3			NV							64	99.36			NV
					65	99.89			NV							65	99.51			NV
					66	99.3			NV							66	98	96	86	MEL
					67	99.2			NV							67	87	99.24		NV
					68	100			NV							68	99.98			NV
					69	99.72			NV							69	99.66			NV
					70	99.23			NV							70	92	80	96	MEL
					71	99.93			NV							71	99.97			NV
					72	99.39			NV							72	88	99.25		NV
					73	99.32			NV							73	99.55			NV
					74	99.64			NV							74	99.63			NV
					75	84	99.52		NV							75	99.32			NV
					76	99.94			NV							76	99.99			NV
					77	99.85			NV							77	99.49			NV
					78	99.46			NV							78	99.78			NV
					79	99.29			NV							79	99.39			NV
					80	99.38			NV							80	99.54			NV
					81	99.87			NV							81	99.93			NV
					82	99.97			NV							82	99.68			NV
					83	99.71			NV							83	86	86	99.25	NV
					84	99.58			NV							84	99.31			NV
					85	99.91			NV							85	99.8			NV
					86	93	99.22		NV							86	99.22			NV
					87	99.27			NV							87	90	85	94	MEL
					88	99.82			NV							88	99.56			NV
					89	90	97	91	MEL							89	84	99.29		NV
					90	99.62			NV							90	89	99.5		NV
					91	99.24			NV							91	99.31			NV
					92	99.4			NV							92	99.25			NV
					93	100			NV							93	99.99			NV
					94	99.58			NV							94	99.32			NV
					95	99.9			NV							95	99.8			NV
					96	85	94	85	MEL							96	91	99.36		NV
					97	85	99.32		NV							97	99.25			NV
					98	99.98			NV							98	99.42			NV
					99	86	87	91	MEL							99	96	97	92	MEL
					100	99.75			NV							100	99.65			NV
NV(vgg19)					MEL(vgg19)						NV(mobilenetv2)					MEL(mobilenetv2)
image id	trial 1	trial 2	trial 3	predicted	image id	trial 1	trial 2	trial 3	predicted		image id	trial 1	trial 2	trial 3	predicted	image id	trial 1	trial 2	trial 3	predicted
1	99.29	99.89	99.36	NV	1	99.29			NV		1	91			MEL	1	85	80	99.2	NV
2	99.6	99.88	99.74	NV	2	99.42			NV		2	99.79	99.7	99.24	NV	2	87	99.2		NV
3	99.97	99.86	99.97	NV	3	85	85	81	MEL		3	100	99.99	99.94	NV	3	99.32			NV
4	99.38	86		MEL	4	99.25			NV		4	99.64	99.22	87	MEL	4	99.27			NV
5	100	99.99	100	NV	5	99.73			NV		5	100	100	100	NV	5	99.78			NV
6	99.85	99.85	100	NV	6	98	97	93	MEL		6	99.86	99.93	99.86	NV	6	98	97	98	MEL
7	99.73	99.29	84	MEL	7	99.23			NV		7	99.35	99.27	99.21	NV	7	99.34			NV
8	99.93	99.98	99.86	NV	8	95	97	98	MEL		8	99.97	99.99	99.97	NV	8	96	99	99	MEL
9	99.59	99.38	99.79	NV	9	99.5			NV		9	91			MEL	9	99.76			NV
10	99.56	99.51	99.49	NV	10	99.49			NV		10	99.79	99.94	99.42	NV	10	99.68			NV
11	99.58	99.67	99.42	NV	11	99.82			NV		11	99.39	93		MEL	11	99.91			NV
12	99.26	99.49	99.48	NV	12	99.27			NV		12	99.29	99.89	99.66	NV	12	99.23			NV
13	99.84	99.89	99.8	NV	13	85	92	91	MEL		13	99.99	99.6	99.76	NV	13	98	91	94	MEL
14	99.93	99.93	99.94	NV	14	99.94			NV		14	99.99	99.92	99.63	NV	14	99.77			NV
15	99.97	99.58	99.88	NV	15	99.57			NV		15	99.95	99.82	99.98	NV	15	99.52			NV
16	99.98	99.96	99.96	NV	16	99.73			NV		16	99.92	100	99.98	NV	16	99.99			NV
17	99.84	99.47	99.79	NV	17	99.2			NV		17	99.76	99.84	99.81	NV	17	99.24			NV
18	99.88	99.6	99.93	NV	18	94	93	93	MEL		18	99.86	99.83	99.87	NV	18	96	91	99.22	NV
19	100	100	99.99	NV	19	93	92	98	MEL		19	99.9	100	99.99	NV	19	99.2			NV
20	99.86	99.82	99.95	NV	20	99.32			NV		20	99.48	99.5	99.59	NV	20	90	84	95	MEL
21	84			MEL	21	97	99	99	MEL		21	86			MEL	21	100	99	100	MEL
22	99.48	99.39	99.3	NV	22	99.57			NV		22	99.34	99.77	99.45	NV	22	99.85			NV
23	100	100	100	NV	23	99.89			NV		23	100	100	100	NV	23	99.6			NV
24	99.8	99.76	99.42	NV	24	96	98	98	MEL		24	99.55	99.72	99.4	NV	24	99	99.24		NV
25	99.31	99.64	99.3	NV	25	90	84	99.41	NV		25	99.92	99.3	86	MEL	25	99.66			NV
26	99.56	99.65	99.5	NV	26	89	99.4		NV		26	99.71	99.9	99.71	NV	26	99.42			NV
27	87			MEL	27	91	84	99.2	NV		27	86			MEL	27	99.75			NV
28	99.96	99.99	99.72	NV	28	99.7			NV		28	99.8	99.96	99.8	NV	28	99.92			NV
29	99.93	99.75	99.95	NV	29	99.24			NV		29	99.96	99.91	99.82	NV	29	99.31			NV
30	100	99.99	99.99	NV	30	99.48			NV		30	99.96	99.99	100	NV	30	99.76			NV
31	99.98	99.91	99.88	NV	31	87	99.6		NV		31	99.98	99.98	99.84	NV	31	85	99.64		NV
32	99.99	99.98	99.48	NV	32	99.32			NV		32	99.73	99.81	99.99	NV	32	99.55			NV
33	87			MEL	33	99.97			NV		33	92			MEL	33	99.78			NV
34	99.92	99.97	99.94	NV	34	99.97			NV		34	92	99.7	99.9	NV	34	99.93			NV
35	100	99.93	100	NV	35	100			NV		35	100	99.99	99.97	NV	35	99.74			NV
36	99.91	99.99	99.96	NV	36	91	92	96	MEL		36	99.95	99.97	99.85	NV	36	92	92	97	MEL
37	99.82	99.66	99.28	NV	37	99.37			NV		37	99.24	99.42	99.45	NV	37	99.36			NV
38	99.83	99.91	99.87	NV	38	99.32			NV		38	99.74	99.94	99.79	NV	38	99.43			NV
39	99.53	99.91	99.93	NV	39	99.38			NV		39	99.81	99.85	99.71	NV	39	99.97			NV
40	99.99	99.99	99.98	NV	40	99.67			NV		40	100	99.99	99.99	NV	40	99.44			NV
41	100	100	100	NV	41	98	88	88	MEL		41	100	100	100	NV	41	93	91	93	MEL
42	99.92	99.97	99.99	NV	42	83	99.67		NV		42	99.98	99.99	99.67	NV	42	85	96	92	MEL
43	99.89	99.95	99.86	NV	43	99.28			NV		43	99.79	99.67	99.95	NV	43	99.33			NV
44	99.98	99.86	99.98	NV	44	92			NV		44	99.99	99.31	99.96	NV	44	99.28			NV
45	84			MEL	45	99.57			NV		45	99.53	99.53	99.66	NV	45	99.47			NV
46	99.33	99.43	99.91	NV	46	96	99.21		NV		46	99.99	99.97	99.4	NV	46	99.31			NV
47	99.97	99.95	99.97	NV	47	99.95			NV		47	99.97	99.99	99.97	NV	47	99.63			NV
48	100	99.99	99.99	NV	48	88	94	92	MEL		48	100	100	100	NV	48	81	99.2		NV
49	99.93	99.91	99.9	NV	49	84	99.31		NV		49	99.57	99.46	99.9	NV	49	99.49			NV
50	99.95	99.79	99.39	NV	50	80	93	94	MEL		50	99.48	99.87	99.39	NV	50	99.24			NV
					51	99.49			NV							51	86	86	83	MEL
					52	99	99	99	MEL							52	99	99	97	MEL
					53	99.32			NV							53	99.6			NV
					54	93	88	98	MEL							54	96	100	97	MEL
					55	83	99.38		NV							55	99.62			NV
					56	96	92	99.24	NV							56	99.32			NV
					57	99.89			NV							57	99.9			NV
					58	80	96	99.26	NV							58	99.54			NV
					59	99.46			NV							59	99.4			NV
					60	86	96	91	MEL							60	95	95	98	MEL
					61	100			NV							61	100			NV
					62	99.66			NV							62	99.31			NV
					63	89	87	96	MEL							63	98	96	96	MEL
					64	99.34			NV							64	99.33			NV
					65	99.83			NV							65	99.23			NV
					66	94	91	99.25	NV							66	99.26			NV
					67	99.37			NV							67	99.24			NV
					68	99.98			NV							68	100			NV
					69	99.54			NV							69	99.77			NV
					70	92	87	82	MEL							70	99.34			NV
					71	99.99			NV							71	99.79			NV
					72	91	88	99.27	MEL							72	99.93			NV
					73	99.3			NV							73	99.57			NV
					74	99.62			NV							74	99.81			NV
					75	93	90	88	MEL							75	99.25			NV
					76	99.95			NV							76	99.99			NV
					77	99.45			NV							77	99.45			NV
					78	99.38			NV							78	99.51			NV
					79	99.22			NV							79	87	99.21		NV
					80	99.46			NV							80	99.22			NV
					81	99.58			NV							81	99.56			NV
					82	99.95			NV							82	99.89			NV
					83	90	93	86	MEL							83	85	99.26		NV
					84	99.52			NV							84	99.3			NV
					85	99.91			NV							85	84	87	99.53	MEL
					86	99.41			NV							86	97	80	90	MEL
					87	94	98	94	MEL							87	99.43			NV
					88	87	99.45		NV							88	99.42			NV
					89	92	90	86	MEL							89	99.2			NV
					90	99.24			NV							90	99.28			NV
					91	88	99.31		NV							91	87	99.24		NV
					92	99.31			NV							92	91	85	93	MEL
					93	99.99			NV							93	100			NV
					94	85	81	99.59	NV							94	99.51			NV
					95	99.85			NV							95	99.94			NV
					96	85	87	98	MEL							96	88	87	91	MEL
					97	95	99.27		NV							97	92	91	88	MEL
					98	99.87			NV							98	99.65			NV
					99	84	88	83	MEL							99	93	81	89	MEL
					100	99.33			NV							100	99.29			NV
NV(mobilenetv3)					MEL(mobilenetv3)						NV(Efficientnet)					MEL(Efficientnet)
image id	trial 1	trial 2	trial 3	predicted	image id	trial 1	trial 2	trial 3	predicted		image id	trial 1	trial 2	trial 3	predicted	image id	trial 1	trial 2	trial 3	predicted
1	99.63	82		MEL	1	99.27			NV		1	99.39	99.59	99.61	NV	1	96	97	84	MEL
2	99.28	99.82	99.31	NV	2	99.23			NV		2	99.95	99.51	99.64	NV	2	81	99.37		NV
3	99.9	99.99	99.99	NV	3	93			NV		3	99.99	99.98	99.92	NV	3	99.42			NV
4	99.35	99.31	84	MEL	4	99.28			NV		4	99.65	83		MEL	4	84			NV
5	100	100	100	NV	5	86	83	92	MEL		5	100	100	100	NV	5	99.95			NV
6	99.9	99.97	99.98	NV	6	99.3			NV		6	99.96	100	99.92	NV	6	99	96	96	MEL
7	94			MEL	7	99	99	99	MEL		7	91			MEL	7	81	99.6		NV
8	99.89	99.94	99.89	NV	8	87	99.56		NV		8	99.89	99.74	99.89	NV	8	91	99	96	MEL
9	88			MEL	9	96	98	100	MEL		9	99.63	99.66	99.72	NV	9	99.41			NV
10	99.5	99.77	99.48	NV	10	99.73			NV		10	99.3	99.21	99.49	NV	10	99.69			NV
11	84			MEL	11	84	99.36		NV		11	99.36	99.87	99.47	NV	11	99.76			NV
12	99.37	99.47	99.29	NV	12	82	90	99.25	NV		12	99.72	99.68	99.54	NV	12	99.38			NV
13	99.58	99.75	99.57	NV	13	94	97	95	MEL		13	99.79	99.68	99.77	NV	13	94	94	86	MEL
14	99.58	99.51	99.72	NV	14	99.73			NV		14	99.87	99.96	99.99	NV	14	99.85			NV
15	99.89	99.8	99.76	NV	15	82	86	99.5	NV		15	99.94	99.93	99.83	NV	15	99.33			NV
16	99.85	99.85	99.83	NV	16	99.99			NV		16	100	99.97	99.97	NV	16	99.94			NV
17	99.66	99.3	99.45	NV	17	90	91	93	MEL		17	99.91	99.75	99.94	NV	17	99.53			NV
18	99.84	99.7	99.89	NV	18	92	96	96	MEL		18	99.96	99.95	99.83	NV	18	97	96	97	MEL
19	99.89	99.99	99.99	NV	19	99.38			NV		19	100	99.99	100	NV	19	95	85	95	MEL
20	99.68	99.55	99.42	NV	20	89	86	90	MEL		20	99.89	99.91	99.88	NV	20	91	88	89	MEL
21	99.23	99.3	99.3	NV	21	99	99	99	MEL		21	90			MEL	21	100	100	99	MEL
22	99.24	99.5	99.38	NV	22	99.74			NV		22	99.54	99.7	99.4	NV	22	99.49			NV
23	99.99	100	100	NV	23	99.63			NV		23	100	100	100	NV	23	99.98			NV
24	85			MEL	24	95	97	97	MEL		24	99.82	99.5	99.39	NV	24	92	88	92	MEL
25	83			MEL	25	99.21			NV		25	99.78	84		MEL	25	99.52			NV
26	99.5	99.7	99.7	NV	26	99.49			NV		26	99.89	99.8	99.59	NV	26	99.4			NV
27	85			MEL	27	97	92	99.27	NV		27	99.81	99.37	99.23	NV	27	99.22			NV
28	99.87			MEL	28	99.83			NV		28	99.99	99.99	99.99	NV	28	99.98			NV
29	99.91	99.92	99.96	NV	29	93	99.2		NV		29	99.99	100	99.97	NV	29	99.21			NV
30	99.97	99.97	99.99	NV	30	99.54			NV		30	99.99	100	100	NV	30	99.49			NV
31	99.93	99.72	99.73	NV	31	99.29			NV		31	99.89	100	100	NV	31	99.24			NV
32	99.3	99.53	99.53	NV	32	91	99.52		NV		32	99.76	99.84	99.8	NV	32	99.51			NV
33	97			MEL	33	99.68			NV		33	99.23	90		MEL	33	99.78			NV
34	99.95	99.98	99.99	NV	34	99.84			NV		34	99.87	99.99	99.96	NV	34	99.95			NV
35	99.95	99.98	100	NV	35	99.92			NV		35	100	99.99	99.99	NV	35	99.99			NV
36	99.95	99.97	99.96	NV	36	96	99.27		NV		36	99.97	99.99	99.98	NV	36	98	91	86	MEL
37	89			MEL	37	99.41			NV		37	99.42	99.88	99.86	NV	37	89	87	98	MEL
38	99.9	99.89	99.75	NV	38	99.35			NV		38	99.92	99.66	99.8	NV	38	99.31			NV
39	99.46	99.32	82	MEL	39	99.98			NV		39	99.9	99.79	99.89	NV	39	99.98			NV
40	99.99	99.99	99.96	NV	40	99.63			NV		40	99.99	99.99	99.99	NV	40	99.8			NV
41	99.99	100	100	NV	41	91	91	92	MEL		41	100	100	100	NV	41	93	99	97	MEL
42	99.95	99.94	99.87	NV	42	91	99.29		NV		42	99.98	99.96	99.99	NV	42	81	87	99.39	NV
43	99.81	99.86	99.55	NV	43	99.55			NV		43	99.98	99.97	99.96	NV	43	99.41			NV
44	100	100	99.76	NV	44	99.57			NV		44	99.93	99.94	99.99	NV	44	91	98	99	MEL
45	99.31	99.34	88	MEL	45	99.86			NV		45	99.4	99.75	99.4	NV	45	99.66			NV
46	99.66	99.84	99.77	NV	46	87	96	98	MEL		46	99.99	99.98	100	NV	46	99.3			NV
47	99.77	99.74	99.84	NV	47	99.75			NV		47	100	99.99	99.97	NV	47	99.89			NV
48	99.99	100	99.81	NV	48	83	91	99.23	NV		48	99.97	99.96	99.99	NV	48	85	97	92	MEL
49	99.67	99.84	99.81	NV	49	99.47			NV		49	99.68	99.83	99.89	NV	49	99.28			NV
50	99.5	99.87	99.71	NV	50	87	83	80	MEL		50	99.62	81		MEL	50	93	91	83	MEL
					51	99.32			NV							51	99.46			NV
					52	97	99	100	MEL							52	99	100	100	MEL
					53	99.22			NV							53	99.39			NV
					54	96	98	98	MEL							54	98	96	97	MEL
					55	99.34			NV							55	99.24			NV
					56	99.52			NV							56	99.58			NV
					57	99.8			NV							57	99.96			NV
					58	99.63			NV							58	88	99.52		NV
					59	99.52			NV							59	99.46			NV
					60	93	98	83	MEL							60	97	98	97	MEL
					61	100			NV							61	100			NV
					62	99.29			NV							62	99.3			NV
					63	93	98	98	MEL							63	94	86	96	MEL
					64	88	95	90	MEL							64	90	99.24		NV
					65	99.26			NV							65	99.67			NV
					66	82	97	92	MEL							66	96	98	93	MEL
					67	99.31			NV							67	99.23			NV
					68	100			NV							68	100			NV
					69	99.74			NV							69	99.35			NV
					70	82	99.2		NV							70	99.31			NV
					71	99.86			NV							71	99.96			NV
					72	83	96	88	MEL							72	99.34			NV
					73	99.33	99.82		NV							73	99.54			NV
					74	87	91	99.23	NV							74	99.64			NV
					75	97	98	94	MEL							75	99.4			NV
					76	99.94			NV							76	99.97			NV
					77	99.52			NV							77	99.43			NV
					78	99.27			NV							78	99.25			NV
					79	82	92	99.25	NV							79	81	91	85	MEL
					80	99.26			NV							80	99.81			NV
					81	99.83			NV							81	99.9			NV
					82	99.77			NV							82	99.9			NV
					83	82	95	99.24	NV							83	99.34			NV
					84	99.47			NV							84	99.35			NV
					85	90	99.74		NV							85	99.75			NV
					86	92	90	93	MEL							86	99.21			NV
					87	93	98	94	MEL							87	99.21			NV
					88	82	86	88	MEL							88	99.45			NV
					89	99.48			NV							89	99.24			NV
					90	99.54			NV							90	99.34			NV
					91	99.36			NV							91	99.72			NV
					92	98	94	89	MEL							92	99.4			NV
					93	100			NV							93	99.99			NV
					94	99.67			NV							94	99.26			NV
					95	99.62			NV							95	99.77			NV
					96	93	90	95	MEL							96	83	92	91	MEL
					97	99.2			NV							97	99.37			NV
					98	99.69			NV							98	99.93			NV
					99	93	97	91	MEL							99	92	88	88	MEL
					100	89	89	99.53	MEL							100	99.36			NV

## Sheet: SkiniveMD
SkiniveMD
						患部：足の裏
NV(baseline)					MEL(baseline)
image id	trial 1	trial 2	trial 3	predicted	image id	trial 1	trial 2	trial 3	predicted
1	Dysplastic Nevus 89%	Dysplastic Nevus 81%	Dysplastic Nevus 83%	NV	1	melanoma 69%	Lentigo-melanoma 89%	Benign Nevus 21%	MEL
2	Dysplastic Nevus 48%	Melanoma 85%	Dysplastic Nevus 88%	NV	2	Dysplastic Nevus 79%	Melanoma 43%	Dysplastic Nevus 86%	NV
3	Dysplastic Nevus 84%	Dysplastic Nevus 80%	Dysplastic Nevus 86%	NV	3	Actinic Keratosis 95%	Actinic Keratosis 91%	Actinic Keratosis 36%	AKIEC
4	Benign Nevus 58%	Benign Nevus 92%	Benign Nevus 91%	NV	4	Dysplastic Nevus 93%	Melanoma 91%	Dysplastic Nevus 85%	NV
5	Melanoam 77%	Melanoam 62%	Melanoam 80%	MEL	5	Dysplastic Nevus 86%	Dysplastic Nevus 88%	Dysplastic Nevus 85%	NV
6	Melanoam 80%	Melanoma 74%	Melanoam 71%	MEL	6	Basal Cell Carcinoma 81%	Basal Cell Carcinoma 37%	Basal Cell Carcinoma 91%	BCC
7	Melanoam 88%	Melanoam 59%	Dysplastic Nevus 64%	MEL	7	Benign Nevus 85%	Actinic Keratosis 75%	Actinic Keratosis 91%	AKIEC
8	Seborrheic Keratosis 93%	Benign Nevus 69%	Seborrheic Keratosis 70%	BKL	8	Melanoma 92%	Melanoma 90%	Melanoma 92%	MEL
9	Dysplastic Nevus 73%	Dysplastic Nevus 71%	Dysplastic Nevus 92%	NV	9	Dyspastic Nevus 72%	Dyspastic Nevus 89%	Dysplastic Nevus 81%	NV
10	Dysplastic Nevus 38%	Dysplastic Nevus 65%	Hemangioma 27%	NV	10	Actinic Keratosis 47%	Actinic Keratosis 73%	Actinic Keratosis 91%	AKIEC
11	Dysplastic Nevus 91%	Dysplastic Nevus 91%	Dysplastic Nevus 93%	NV	11	Basal Cell Carcinoma 66%	Basal Cell Carcinoma 67%	Basal Cell Carcinoma 90%	BCC
12	Basal Cell Carcinoma 41%	Basal Cell Carcinoma 57%	Benign Nevus 37%	BCC	12	Seborrheic Keratosis 87%	Melanoma 91%	Melanoma 91%	MEL
13	Dysplastic Nevus 56%	Dysplastic Nevus 71%	Dysplastic Nevus 83%	NV	13	Melanoma 93%	Melanoma 92%	Melanoma 92%	MEL
14	Dysplastic Nevus 54%	Benign Nevus 54%	Dysplastic Nevus 86%	NV	14	Melanoma 75%	Melanoma 73%	Melanoma 55%	MEL
15	Dysplastic Nevus 91%	Dysplastic Nevus 77%	Dysplastic Nevus 76%	NV	15	Melanoma 64%	Dysplastic Nevus 64%	Melanoma 74%	MEL
16	Dysplastic Nevus 94%	Dysplastic Nevus 93%	Dysplastic Nevus 80%	NV	16	Melanoma 85%	Benign Nevus 25%	Melanoma 88%	MEL
17	Dysplastic Nevus 87%	Dysplastic Nevus 87%	Dysplastic Nevus 87%	NV	17	Basal Cell Carcinoma 95%	Melanoma 51%	Actinic Keratosis 86%	BCC
18	Dysplastic Nevus 74%	Dysplastic Nevus 87%	Dysplastic Nevus 85%	NV	18	Melanoma 59%	Melanoma 86%	Seborrheic Keratosis 40%	MEL
19	Dysplastic Nevus 64%	Benign Nevus 49%	Dysplastic Nevus 82%	NV	19	Dysplastic Nevus 68%	Dysplastic Nevus 79%	Dysplastic Nevus 85%	NV
20	Dysplastic Nevus 89%	Dysplastic Nevus 83%	Dysplastic Nevus 88%	NV	20	Melanoma 43%	Dysplastic Nevus 23%	Dysplastic Nevus 84%	NV
NV(res18)					MEL(res18)
image id	trial 1	trial 2	trial 3	predicted	image id	trial 1	trial 2	trial 3	predicted
1	Dysplastic Nevus 45%	Hemanginoma 37%	Dysplastic Nevus 77%	NV	1	Squamous Cell Carcinoma 90%	Squamous Cell Carcinoma 89%	Hemanginoma 33%	AKIEC
2	Dysplastic Nevus 79%	Dysplastic Nevus 64%	Dysplastic Nevus 82%	NV	2	Dysplastic Nevus 89%	Dysplastic Nevus 89%	Dysplastic Nevus 93%	NV
3	Benign Nevus 76%	Benign Nevus 67%	Benign Nevus 88%	NV	3	Benign Nevus 42%			NV
4	Benign Nevus 79%	Benign Nevus 45%	Benign Nevus 87%	NV	4	Melanoma 87%	Melanoma 91%	Melanoma 91%	MEL
5	Benign Nevus 74%	Benign Nevus 92%	Benign Nevus 77%	NV	5	Dysplastic Nevus 92%	Dysplastic Nevus 92%	Dysplastic Nevus 92%	NV
6	Dysplastic Nevus 49%	Papillomatous Nevus 84%	Dysplastic Nevus 42%	NV	6	Squamous Cell Carcinoma 33%	Melanoma 95%	Papillomatous Nevus 91%	MEL
7	Hemangioma 87%	Dysplastic Nevus 67%	Dysplastic Nevus 61%	VASC	7	Benign Nevus 56%			NV
8	Benign Nevus 92%	Benign Nevus 92%	Benign Nevus 91%	NV	8	Melanoma 94%	melanoma 82%	melaoma 88%	MEL
9	Dysplastic Nevus 57%	Dysplastic Nevus 59%	Dysplastic Nevus 71%	NV	9	Dysplastic Nevus 78%	Dysplastic Nevus 78%	Dysplastic Nevus 88%	NV
10	Squamous Cell Carcinoma 15%			AKIEC	10	Actinic Keratosis 89%	Actinic Keratosis 57%	Lentigo 71%	AKIEC
11	Basal Cell Carcinoma 69%			BCC	11	Squamous Cell Carcinoma 54%	Squamous Cell Carcinoma 93%	Squamous Cell Carcinoma 22%	AKIEC
12	Benign Nevus 79%	Benign Nevus 59%	Benign Nevus 75%	NV	12	Benign Nevus 93%			NV
13	Benign Nevus 49%	Benign Nevus 44%	Benign Nevus 48%	NV	13	Eczema 95%	Eczema 95%	Eczema 92%	NONE
14	Dysplastic Nevus 63%	Benign Nevus 38%	Dysplastic Nevus 80%	NV	14	Dysplastic Nevus 70%	Dysplastic Nevus 70%	Dysplastic Nevus 69%	NV
15	Dysplastic Nevus 84%	Dysplastic Nevus 89%	Dysplastic Nevus 92%	NV	15	Dysplastic Nevus 87%	Dysplastic Nevus 53%	Dysplastic Nevus 89%	NV
16	Benign Nevus 64%	Benign Nevus 71%	Benign Nevus 51%	NV	16	Dysplastic Nevus 88%	Dysplastic Nevus 75%	Dysplastic Nevus 88%	NV
17	Dysplastic Nevus 71%	Dysplastic Nevus 75%	Dysplastic Nevus 69%	NV	17	Dysplastic Nevus 76%	Hemangioma 59%		NV
18	Basal Cell Carcinoma 31%			BCC	18	Squamous Cell Carcinoma 92%	Benign Nevus 30%		AKIEC
19	Benign Nevus 70%	Benign Nevus 79%	Pyogenic Granuloma 41%	NV	19	Dysplastic Nevus 77%	Dysplastic Nevus 86%	Dysplastic Nevus 89%	NV
20	Basal Cell Carcinoma 31%			BCC	20	Dysplastic Nevus 58%	Dysplastic Nevus 41%	Dysplastic Nevus 73%	NV
NV(res50)					MEL(res50)
image id	trial 1	trial 2	trial 3	predicted	image id	trial 1	trial 2	trial 3	predicted
1	Dysplastic Nevus 53%	Benign Nevus 52%	Benign Nevus 52%	NV	1	Squamous Cell Carcinoma 92%	Squamous Cell Carcinoma 55%	Squamous Cell Carcinoma 86%	AKIEC
2	Dysplastic Nevus 90%	Dysplastic Nevus 83%	Dysplastic Nevus 73%	NV	2	Dysplastic Nevus 92%	Dysplastic Nevus 92%	Dysplastic Nevus 93%	NV
3	Dysplastic Nevus 47%	Hemanginoma 47%	Hemanginoma 88%	VASC	3	Dysplastic Nevus 93%	Dysplastic Nevus 90%	Dysplastic Nevus 91%	NV
4	Benign Nevus 92%	Benign Nevus 89%	Benign Nevus 92%	NV	4	Melnoma 91%	Melanoma 93%	Melanoma 86%	MEL
5	Benign Nevus 74%	Dysplastic Nevus 75%	Benign Nevus 87%	NV	5	Dysplastic Nevus 90%	Dysplastic Nevus 92%	Dysplastic Nevus 91%	NV
6	Papillomatous Nevus 58%	Papillomatous Nevus 48%	Benign Nevus 81%	NV	6	Melnoma 95%	Melnoma 74%	Melnoma 94%	MEL
7	Melanoam 83%			MEL	7	Lentigo 92%	Lentigo 64%	Lentigo 66%	NONE
8	Benign Nevus 89%	Benign Nevus 88%	Benign Nevus 88%	NV	8	Melanoma 94%	Melanoma 93%	Melanoma 93%	MEL
9	Benign Nevus 73%	Dysplastic Nevus 77%	Dysplastic Nevus 75%	NV	9	Dysplastic Nevus 90%	Dysplastic Nevus 92%	Dysplastic Nevus 90%	NV
10	Squamous Cell Carcinoma 50%			AKIEC	10	Squamous Cell Carcinoma 89%	Actinic Keratosis 84%	Eczema 43%	AKIEC
11	Benign Nevus 88%	Benign Nevus 55%	Dysplastic Nevus 81%	NV	11	Lentigo 67%	Squamous Cell Carcinoma 83%	Melanoma 52%	AKIEC
12	Squamous Cell Carcinoma 22%			AKIEC	12	Benign Nevus 50%			NV
13	Benign Nevus 90%	Benign Nevus 79%	Benign Nevus 68%	NV	13	Melanoma 92%	Melanoma 88%	Melanoma 92%	MEL
14	Dysplastic Nevus 93%	Dysplastic Nevus 83%	Dysplastic Nevus 85%	NV	14	Dysplastic Nevus 86%	Melanoma 34%	Dysplastic Nevus 81%	NV
15	Dysplastic Nevus 87%	Dysplastic Nevus 86%	Dysplastic Nevus 91%	NV	15	Dysplastic Nevus 86%	Lentigo 92%	Lentigo 89%	NV
16	Acral nevus 93%	Acral nevus 94%	Acral nevus 93%	NV	16	Dysplastic Nevus 76%	Dysplastic Nevus 88%	Dysplastic Nevus 78%	NV
17	Dysplastic Nevus 59%	Dysplastic Nevus 45%	Dysplastic Nevus 53%	NV	17	Hemangioma 64%			VASC
18	Basal Cell Carcinoma 88%			BCC	18	Squamous Cell Carcinoma 43%	Squamous Cell Carcinoma 62%	Squamous Cell Carcinoma 49%	AKIEC
19	Benign Nevus 92%	Benign Nevus 65%	Benign Nevus 45%	NV	19	Benign Nevus 91%			NV
20	Benign Nevus 61%	Dysplastic Nevus 78%	Benign Nevus 74%	NV	20	Dysplastic Nevus 80%	Dysplastic Nevus 70%	Dysplastic Nevus 87%	NV
NV(vgg16)					MEL(vgg16)
image id	trial 1	trial 2	trial 3	predicted	image id	trial 1	trial 2	trial 3	predicted
1	Benign Nevus 80%	Benign Nevus 67%	Benign Nevus 79%	NV	1	Squamous Cell Carcinoma 88%	Squamous Cell Carcinoma 89%	Pityriasis Rubra Pilaris Devergie 61%	AKIEC
2	Dysplastic Nevus 80%	Dysplastic Nevus 73%	Dysplastic Nevus 81%	NV	2	Dysplastic Nevus 92%	Dysplastic Nevus 90%	Dysplastic Nevus 93%	NV
3	Dysplastic Nevus 77%	Dysplastic Nevus 48%	Dysplastic Nevus 44%	NV	3	Dysplastic Nevus 92%	Dysplastic Nevus 87%	Dysplastic Nevus 89%	NV
4	Dysplastic Nevus 49%	Dysplastic Nevus 64%	Dysplastic Nevus 61%	NV	4	Dysplastic Nevus 52%	Melanoma 73%	Melanoma 94%	MEL
5	Benign Nevus 59%	Benign Nevus 54%	Benign Nevus 53%	NV	5	Dysplastic Nevus 91%	Dysplastic Nevus 92%	Dysplastic Nevus 93%	NV
6	Melanoma 52%			MEL	6	Melanoma 76%	Hemanginoma 22%		MEL
7	Dysplastic Nevus 88%	Dysplastic Nevus 85%	Dysplastic Nevus 87%	NV	7	Bengin Nevus 49%			NV
8	Benign Nevus 93%	Benign Nevus 90%	Benign Nevus 89%	NV	8	Melanoma 90%	Melanoma 91%	Melanoma 95%	MEL
9	Benign Nevus 42%	Melanoma 62%		MEL	9	Dysplastic Nevus 89%	Dysplastic Nevus 88%	Dysplastic Nevus 90%	NV
10	Benign Nevus 84%	Benign Nevus 76%	Dysplastic Nevus 35%	NV	10	Actinic Keratosis 67%	Actinic Keratosis 35%	Actinic Keratosis 28%	AKIEC
11	Dysplastic Nevus 90%	Dysplastic Nevus 86%	Dysplastic Nevus 86%	NV	11	Actinic Keratosis 90%	Benign Nevus 33%		AKIEC
12	Dermatitis 37%	Seborrheic Keratosis 28%	Dermatits 15%	NONE	12	Bengin Nevus 77%			NV
13	Benign Nevus 93%	Benign Nevus 93%	Benign Nevus 92%	NV	13	Melanoma 82%	Melanoma 93%	Melanoma 94%	MEL
14	Dysplastic Nevus 90%	Dysplastic Nevus 74%	Dysplastic Nevus 46%	NV	14	Dysplastic Nevus 88%	Dysplastic Nevus 76%	Dysplastic Nevus 91%	NV
15	Dysplastic Nevus 92%	Dysplastic Nevus 91%	Dysplastic Nevus 92%	NV	15	Lentigo 73%	Lentigo 73%	Dysplastic Nevus 89%	NV
16	Acral nevus 92%	Benign Nevus 47%	Acral nevus 91%	NV	16	Dysplastic Nevus 91%	Dysplastic Nevus 90%	Dysplastic Nevus 89%	NV
17	Benign Nevus 65%	Hemangioma 62%	Dysplastic Nevus 83%	NV	17	Dysplastic Nevus 23%	Seborrheic Keratosis 31%	Dysplastic Nevus 13%	NV
18	Dysplastic Nevus 90%	Squamous Cell Carcinoma 56%		NV	18	Seborrheic Keratosis 53%	squamous Cell Carcinoma 85%	Pityriasis Rubra Pilaris Devergie 62%	AKIEC
19	Hemanginoma 91%	Hemanginoma 91%	Hemanginoma 89%	VASC	19	Dysplastic Nevus 81%	Dysplastic Nevus 53%	Dysplastic Nevus 58%	NV
20	Hemanginoma 27%	Hemanginoma 33%	Hemanginoma 52%	VASC	20	Dysplastic Nevus 91%	Dysplastic Nevus 86%	Dysplastic Nevus 88%	NV
NV(vgg19)					MEL(vgg19)
image id	trial 1	trial 2	trial 3	predicted	image id	trial 1	trial 2	trial 3	predicted
1	Dysplastic Nevus 80%	Benign Nevus 58%	Benign Nevus 54%	NV	1	Squamous Cell Carcinoma 23%	Seborrheic Keratosis 43%	Seborrheic Keratosis 29%	BKL
2	Dysplastic Nevus 91%	Dysplastic Nevus 91%	Dysplastic Nevus 91%	NV	2	Dysplastic Nevus 87%	Dysplastic Nevus 82%	Dysplastic Nevus 93%	NV
3	Dysplastic Nevus 64%	Dysplastic Nevus 88%	Benign Nevus 52%	NV	3	Dysplastic Nevus 91%	Dysplastic Nevus 71%	Dysplastic Nevus 91%	NV
4	Benign Nevus 71%	Benign Nevus 75%	Benign Nevus 81%	NV	4	Dysplastic Nevus 46%	Melanoma 46%	Melanoma 54%	MEL
5	Dysplastic Nevus 84%	Dysplastic Nevus 76%	Dysplastic Nevus 43%	NV	5	Dysplastic Nevus 93%	Dysplastic Nevus 91%	Dysplastic Nevus 92%	NV
6	Papillomatous Nevus 37%	Papillomatous Nevus 55%	Dysplastic Nevus 95%	NV	6	Melanoma 94%	Melanoma 94%	Melanoma 73%	MEL
7	Dysplastic Nevus 89%	Dysplastic Nevus 60%	Dysplastic Nevus 90%	NV	7	Lentigo 76%	Lentigo 91%	Lentigo 88%	BKL
8	Benign Nevus 84%	Benign Nevus 92%	Benign Nevus 89%	NV	8	Melanoma 95%	Melanoma 95%	Melanoma 94%	MEL
9	Dysplastic Nevus 74%	Dysplastic Nevus 67%	Benign Nevus 33%	NV	9	Dysplastic Nevus 88%	Dysplastic Nevus 92%	Dysplastic Nevus 89%	NV
10	Benign Nevus 17%	Hemanginoma 86%	Hemanginoma 77%	VASC	10	Squamous Cell Carcinoma 23%	Actinic Keratosis 39%	Actinic Keratosis 78%	AKIEC
11	Dysplastic Nevus 80%	Dysplastic Nevus 88%	Dysplastic Nevus 90%	NV	11	Squamous Cell Carcinoma 93%	Squamous Cell Carcinoma 92%	Squamous Cell Carcinoma 92%	AKIEC
12	Squamous Cell Carcinoma 36%			AKIEC	12	Benign Nevus 58%			NV
13	Benign Nevus 95%	Benign Nevus 93%	Benign Nevus 94%	NV	13	Melanoma 94%	Melanoma 93%	Melanoma 93%	MEL
14	Dysplastic Nevus 88%	Melanoma 36%		NV	14	Dysplastic Nevus 65%	Dysplastic Nevus 83%	Dysplastic Nevus 70%	NV
15	Dysplastic Nevus 88%	Dysplastic Nevus 92%	Dysplastic Nevus 93%	NV	15	Dysplastic Nevus 65%	Lentigo 38%	Lentigo 41%	NV
16	Benign Nevus 54%	Benign Nevus 80%	Acral nevus 84%	NV	16	Dysplastic Nevus 88%	Dysplastic Nevus 89%	Dysplastic Nevus 92%	NV
17	Dysplastic Nevus 86%	Dysplastic Nevus 83%	Dysplastic Nevus 83%	NV	17	Melanoma 34%	Hemanginoma 69%		VASC
18	Dysplastic Nevus 83%	Dysplastic Nevus 88%	Dysplastic Nevus 78%	NV	18	Seborrheic Keratosis 83%	Melanoma 52%	Melanoma 77%	BKL
19	Benign Nevus 73%	Benign Nevus 90%	Benign Nevus 84%	NV	19	Dysplastic Nevus 88%	Dysplastic Nevus 79%	Dysplastic Nevus 82%	NV
20	Dysplastic Nevus 57%	Dysplastic Nevus 78%	Dysplastic Nevus 70%	NV	20	Dysplastic Nevus 87%	Dysplastic Nevus 90%	Dysplastic Nevus 89%	NV
NV(Densenet121)					MEL(densenet121)
image id	trial 1	trial 2	trial 3	predicted	image id	trial 1	trial 2	trial 3	predicted
1	Dysplastic Nevus 71%	Dysplastic Nevus 42%	Dysplastic Nevus 49%	NV	1	Dysplastic Nevus 52%	Seborrheic Keratosis 29%	Squamous Cell Carcinoma 81%	AKIEC
2	Dysplastic Nevus 82%	Dysplastic Nevus 92%	Dysplastic Nevus 90%	NV	2	Dysplastic Nevus 89%	Dysplastic Nevus 92%	Dysplastic Nevus 93%	NV
3	Benign Nevus 68%	Dysplastic Nevus 76%	Dysplastic Nevus 86%	NV	3	Dysplastic Nevus 89%	Dysplastic Nevus 69%	Melanoma 35%	NV
4	Benign Nevus 51%	Benign Nevus 51%	Dysplastic Nevus 47%	NV	4	Melanoma 41%	Melanoma 86%	Melanoma 60%	MEL
5	Dysplastic Nevus 71%	Dysplastic Nevus 89%	Dysplastic Nevus 45%	NV	5	Dysplastic Nevus 90%	Dysplastic Nevus 89%	Dysplastic Nevus 89%	NV
6	Melanoma 70%			MEL	6	Pyogenic Granuloma 81%			VASC
7	Dysplastic Nevus 79%	Dysplastic Nevus 82%	Dysplastic Nevus 67%	NV	7	Benign Nevus 86%			NV
8	Benign Nevus 64%	Seborrheic Keratosis 55%	Benign Nevus 90%	NV	8	Dysplastic Nevus 81%	Melanoma 94%	Melanoma 93%	MEL
9	Melanoma 61%			MEL	9	Dysplastic Nevus 89%	Dysplastic Nevus 83%	Dysplastic Nevus 84%	NV
10	Dysplastic Nevus 49%	Squamous Cell Carcinoma 35%		NV	10	Squamous Cell Carcinoma 63%	Actinic Keratosis 24%	Squamous Cell Carcinoma 89%	AKIEC
11	Dysplastic Nevus 91%	Dysplastic Nevus 87%	Dysplastic Nevus 91%	NV	11	Actinic Keratosis 92%	Squamous Cell Carcinoma 95%	Squamous Cell Carcinoma 65%	AKIEC
12	Basal Cell Carcinoma 20%			BCC	12	Melanoma 69%	Seborrheic Keratosis 40%	Benign Nevus 87%	NV
13	Dysplastic Nevus 49%	Benign Nevus 90%	Benign Nevus 93%	NV	13	Melanoma 83%	Melanoma 93%	Melanoma 94%	MEL
14	Dysplastic Nevus 68%	Dysplastic Nevus 91%	Dysplastic Nevus 92%	NV	14	Dysplastic Nevus 75%	Dysplastic Nevus 50%	Dysplastic Nevus 62%	NV
15	Dysplastic Nevus 79%	Melanoma 56%		NV	15	Lentigo 78%	Lentigo 62%	Lentigo 44%	BKL
16	Acral nevus 93%	Acral nevus 93%	Acral nevus 93%	NV	16	Melanoma 94%	Melanoma 80%	Melanoma 89%	MEL
17	Dysplastic Nevus 73%	Dysplastic Nevus 80%	Dysplastic Nevus 74%	NV	17	Hemangioma 42%			VASC
18	Dysplastic Nevus 88%	Squamous Cell Carcinoma 34%		NV	18	Seborrheic Keratosis 57%	Seborrheic Keratosis 48%	Seborrheic Keratosis 76%	BKL
19	Benign Nevus 92%	Hemangioma 86%	Benign Nevus 64%	NV	19	Dysplastic Nevus 91%	Dysplastic Nevus 88%	Dysplastic Nevus 82%	NV
20	Benign Nevus 60%	Dysplastic Nevus 48%	Dysplastic Nevus 83%	NV	20	Dysplastic Nevus 89%	Melanoma 57%	Melanoma 39%	NV
NV(Densenet201)					MEL(densenet201)
image id	trial 1	trial 2	trial 3	predicted	image id	trial 1	trial 2	trial 3	predicted
1	Dysplastic Nevus 72%	Dysplastic Nevus 53%	Dysplastic Nevus 92%	NV	1	Dysplastic Nevus 14%	Seborrheic Keratosis 30%	Dysplastic Nevus 21%	BKL
2	Dysplastic Nevus 92%	Dysplastic Nevus 90%	Dysplastic Nevus 91%	NV	2	Dysplastic Nevus 92%	Dysplastic Nevus 93%	Dysplastic Nevus 93%	NV
3	Benign Nevus 55%	Benign Nevus 71%	Benign Nevus 54%	NV	3	Dysplastic Nevus 91%	Dysplastic Nevus 92%	Dysplastic Nevus 88%	NV
4	Benign Nevus 89%	Benign Nevus 82%	Benign Nevus 92%	NV	4	Melanoma 73%	Melanoma 72%	Melanoma 91%	MEL
5	Benign Nevus 65%	Benign Nevus 50%	Dysplastic Nevus 60%	NV	5	Dysplastic Nevus 92%	Dysplastic Nevus 92%	Dysplastic Nevus 92%	NV
6	Lentigo 78%	Lentigo 59%	Seborrheic Keratosis 21%	BKL	6	Melanoma 93%	Melanoma 94%	Melanoma 82%	MEL
7	Melanoma 39%			MEL	7	Lentigo 91%	Lentigo 82%	Lentigo 41%	BKL
8	Benign Nevus 46%	Benign Nevus 88%	Benign Nevus 77%	NV	8	Melanoma 94%	Melanoma 94%	Melanoma 95%	MEL
9	Benign Nevus 50%	Dysplastic Nevus 78%	Dysplastic Nevus 85%	NV	9	Dysplastic Nevus 91%	Dysplastic Nevus 90%	Dysplastic Nevus 90%	NV
10	Dysplastic Nevus 74%	Dysplastic Nevus 83%	Squamous Cell Carcinoma 53%	NV	10	Actinic Keratosis 41%	Actinic Keratosis 82%	Actinic Keratosis 36%	AKIEC
11	Dysplastic Nevus 53%	Dysplastic Nevus 89%	Dysplastic Nevus 63%	NV	11	Squamous Cell Carcinoma 92%	Squamous Cell Carcinoma 93%	Squamous Cell Carcinoma 73%	AKIEC
12	Seborrheic Keratosis 71%	Dermatits 44%	Squamous Cell Carcinoma 44%	BKL	12	Benign Nevus 60%			NV
13	Benign Nevus 92%	Benign Nevus 93%	Benign Nevus 93%	NV	13	Melanoma 93%	Melanoma 94%	Melanoma 93%	MEL
14	Dysplastic Nevus 86%	Dysplastic Nevus 91%	Dysplastic Nevus 86%	NV	14	Dysplastic Nevus 80%	Dysplastic Nevus 83%	Dysplastic Nevus 81%	NV
15	Dysplastic Nevus 91%	Dysplastic Nevus 91%	Dysplastic Nevus 93%	NV	15	Dysplastic Nevus 37%	Melanoma 40%	Lentigo 68%	BKL
16	Acral nevus 90%	Acral nevus 93%	Acral nevus 92%	NV	16	Dysplastic Nevus 92%	Dysplastic Nevus 68%	Dysplastic Nevus 38%	NV
17	Dysplastic Nevus 82%	Dysplastic Nevus 88%	Dysplastic Nevus 74%	NV	17	Hemangioma 42%			VASC
18	Dysplastic Nevus 85%	Dysplastic Nevus 88%	Dysplastic Nevus 91%	NV	18	Seborrheic Keratosis 88%	Seborrheic Keratosis 35%	Seborrheic Keratosis 88%	BKL
19	Benign Nevus 94%	Benign Nevus 93%	Benign Nevus 95%	NV	19	Dysplastic Nevus 75%	Dysplastic Nevus 92%	Dysplastic Nevus 83%	NV
20	Dysplastic Nevus 78%	Dysplastic Nevus 86%	Benign Nevus 83%	NV	20	Melanoma 59%	Dysplastic Nevus 62%	Dysplastic Nevus 84%	NV
NV(mobilenetv2)					MEL(mobilenetv2)
image id	trial 1	trial 2	trial 3	predicted	image id	trial 1	trial 2	trial 3	predicted
1	Dysplastic Nevus 66%	Dysplastic Nevus 59%	Dysplastic Nevus 79%	NV	1	Seborrheic Keratosis 30%	Squamous Cell Carcinoma 19%	Squamous Cell Carcinoma 72%	AKIEC
2	Dysplastic Nevus 91%	Dysplastic Nevus 90%	Dysplastic Nevus 91%	NV	2	Dysplastic Nevus 92%	Dysplastic Nevus 87%	Dysplastic Nevus 90%	NV
3	Dysplastic Nevus 62%	Dysplastic Nevus 85%	Dysplastic Nevus 49%	NV	3	Seborrheic Keratosis 42%	Seborrheic Keratosis 69%	Dysplastic Nevus 83%	BKL
4	Benign Nevus 69%	Benign Nevus 80%	Benign Nevus 54%	NV	4	Melanoma 89%	Melanoma 92%	Dysplastic Nevus 50%	MEL
5	Benign Nevus 71%	Benign Nevus 66%	Dysplastic Nevus 47%	NV	5	Dysplastic Nevus 72%	Dysplastic Nevus 92%	Dysplastic Nevus 88%	NV
6	Melanoma 78%			MEL	6	Melanoma 93%	Melanoma 88%	Melanoma 93%	MEL
7	Dysplastic Nevus 58%	Melanoma 47%		NV	7	Lentigo 22%	Lentigo 84%	Lentigo 91%	BKL
8	Benign Nevus 65%	Benign Nevus 76%	Benign Nevus 77%	NV	8	Melanoma 94%	Melanoma 94%	Melanoma 94%	MEL
9	Benign Nevus 47%	Dysplastic Nevus 40%	Dysplastic Nevus 74%	NV	9	Dysplastic Nevus 89%	Dysplastic Nevus 91%	Dysplastic Nevus 69%	NV
10	Squamous Cell Carcinoma 53%			AKIEC	10	Actinic Keratosisi 43%	Lentigo 15%	Actinic Keratosisi 68%	AKIEC
11	Dysplastic Nevus 84%	Dysplastic Nevus 87%	Dysplastic Nevus 89%	NV	11	Squamous Cell Carcinoma 38%	Squamous Cell Carcinoma 87%	Squamous Cell Carcinoma 57%	AKIEC
12	Seborrheic Keratosis 58%	Seborrheic Keratosis 41%	Seborrheic Keratosis 48%	BKL	12	Melanoma 30%	Melanoma 92%	Melanoma 93%	MEL
13	Benign Nevus 91%	Dysplastic Nevus 81%	Benign Nevus 87%	NV	13	Melanoma 93%	Melanoma 93%	Melanoma 94%	MEL
14	Dysplastic Nevus 86%	Dysplastic Nevus 85%	Dysplastic Nevus 89%	NV	14	Dysplastic Nevus 87%	Dysplastic Nevus 73%	Dysplastic Nevus 84%	NV
15	Dysplastic Nevus 90%	Dysplastic Nevus 89%	Dysplastic Nevus 93%	NV	15	Melanoma 47%	Lentigo 61%	Lentigo 36%	BKL
16	Acral nevus 83%	Acral nevus 69%	Acral nevus 56%	NV	16	Dysplastic Nevus 91%	Dysplastic Nevus 68%	Dysplastic Nevus 94%	NV
17	Dysplastic Nevus 82%	Dysplastic Nevus 82%	Dysplastic Nevus 85%	NV	17	Hemangioma 55%			VASC
18	Dysplastic Nevus 72%	Dysplastic Nevus 87%	Dysplastic Nevus 84%	NV	18	Melanoma 46%	Squamous Cell Carcinoma 89%	Seborrheic Keratosis 48%	AKIEC
19	Benign Nevus 95%	Benign Nevus 96%	Benign Nevus 95%	NV	19	Dysplastic Nevus 75%	Dysplastic Nevus 75%	Dysplastic Nevus 76%	NV
20	Dysplastic Nevus 84%	Dysplastic Nevus 52%	Dysplastic Nevus 83%	NV	20	Dysplastic Nevus 84%	Dysplastic Nevus 74%	Dysplastic Nevus 88%	NV
NV(mobilenetv3)					MEL(mobilenetv3)
image id	trial 1	trial 2	trial 3	predicted	image id	trial 1	trial 2	trial 3	predicted
1	Dysplastic Nevus 55%	Dysplastic Nevus 58%	Dysplastic Nevus 68%	NV	1	Seborrheic Keratosis 31%	Melanoma 25%	Dysplastic Nevus 27%	BKL
2	Dysplastic Nevus 90%	Dysplastic Nevus 90%	Dysplastic Nevus 91%	NV	2	Dysplastic Nevus 93%	Dysplastic Nevus 83%	Dysplastic Nevus 92%	NV
3	Dysplastic Nevus 86%	Benign Nevus 63%	Dysplastic Nevus 61%	NV	3	Dysplastic Nevus 89%	Dysplastic Nevus 88%	Dysplastic Nevus 87%	NV
4	Benign Nevus 43%	Benign Nevus 87%	Benign Nevus 92%	NV	4	Melanoma 87%	Melanoma 63%	Melanoma 77%	MEL
5	Dysplastic Nevus 56%	Benign Nevus 41%	Benign Nevus 70%	NV	5	Dysplastic Nevus 91%	Dysplastic Nevus 93%	Dysplastic Nevus 91%	NV
6	Dysplastic Nevus 87%	Actinic Keratosis 29%	Dysplastic Nevus 46%	NV	6	Melanoma 93%	Melanoma 95%	Melanoma 54%	MEL
7	Melanoma 53%			MEL	7	Lentigo 76%	Lentigo 91%	Benign Nevus 78%	BKL
8	Benign Nevus 81%	Benign Nevus 70%	Benign Nevus 77%	NV	8	Melanoma 93%	Melanoma 94%	Melanoma 94%	MEL
9	Dysplastic Nevus 53%	Dysplastic Nevus 61%	Dysplastic Nevus 54%	NV	9	Dysplastic Nevus 92%	Dysplastic Nevus 94%	Dysplastic Nevus 90%	NV
10	Benign Nevus 32%	Squamous Cell Carcinoma 81%		AKIEC	10	Actinic Keratosisi 34%	Squamous Cell Carcinoma 95%	Squamous Cell Carcinoma 94%	AKIEC
11	Dysplastic Nevus 92%	Dysplastic Nevus 92%	Dysplastic Nevus 92%	NV	11	Squamous Cell Carcinoma 25%	Squamous Cell Carcinoma 65%	Dysplastic Nevus 33%	AKIEC
12	Seborrheic Keratosis 20%	Seborrheic Keratosis 18%	Seborrheic Keratosis 14%	BKL	12	Melanoma 92%	Melanoma 93%	Melanoma 92%	MEL
13	Benign Nevus 93%	Benign Nevus 94%	Benign Nevus 94%	NV	13	Melanoma 94%	Melanoma 94%	Melanoma 92%	MEL
14	Dysplastic Nevus 92%	Dysplastic Nevus 87%	Dysplastic Nevus 78%	NV	14	Dysplastic Nevus 81%	Melanoma 83%	Dysplastic Nevus 44%	MEL
15	Dysplastic Nevus 92%	Dysplastic Nevus 91%	Dysplastic Nevus 89%	NV	15	Lentigo 74%	Lentigo 90%	Lentigo 66%	BKL
16	Acral nevus 92%	Acral nevus 93%	Acral nevus 89%	NV	16	Dysplastic Nevus 89%	Dysplastic Nevus 87%	Dysplastic Nevus 92%	NV
17	Dysplastic Nevus 85%	Dysplastic Nevus 87%	Dysplastic Nevus 86%	NV	17	Hemangioma 37%			VASC
18	Dysplastic Nevus 77%	Dysplastic Nevus 83%	Dysplastic Nevus 89%	NV	18	Melanoma 43%	Dysplastic Nevus 31%	Seborrheic Keratosis 89%	BKL
19	Benign Nevus 96%	Benign Nevus 96%	Benign Nevus 95%	NV	19	Dysplastic Nevus 56%	Dysplastic Nevus 83%	Dysplastic Nevus 68%	NV
20	Dysplastic Nevus 78%	Benign Nevus 59%	Dysplastic Nevus 83%	NV	20	Dysplastic Nevus 78%	Dysplastic Nevus 91%	Dysplastic Nevus 89%	NV
NV(vit-base)					MEL(vit-base)
image id	trial 1	trial 2	trial 3	predicted	image id	trial 1	trial 2	trial 3	predicted
1	Benign Nevus 44%	Dysplastic Nevus 85%	Dysplastic Nevus 72%	NV	1	Dysplastic Nevus 69%	Actinic Keratosisi 37%	Dysplastic Nevus 38%	NV
2	Dysplastic Nevus 89%	Dysplastic Nevus 88%	Dysplastic Nevus 90%	NV	2	Dysplastic Nevus 93%	Dysplastic Nevus 94%	Dysplastic Nevus 95%	NV
3	Dysplastic Nevus 86%	Dysplastic Nevus 86%	Dysplastic Nevus 83%	NV	3	Dysplastic Nevus 31%	Seborrheic Keratosis 24%	Melanoma 59%	MEL
4	Benign Nevus 46%	Benign Nevus 66%	Dysplastic Nevus 70%	NV	4	Melanoma 94%	Dysplastic Nevus 62%	Melanoma 91%	MEL
5	Dysplastic Nevus 58%	Benign Nevus 35%	Benign Nevus 35%	NV	5	Dysplastic Nevus 90%	Dysplastic Nevus 91%	Dysplastic Nevus 91%	NV
6	Actinic Keratosisi 70%	Melanoma 55%		AKIEC	6	Melanoma 95%	Melanoma 95%	Melanoma 94%	MEL
7	Melanoma 80%			NV	7	Lentigo 64%	Seborrheic Keratosis 42%	Lentigo 83%	BKL
8	Seborrheic Keratosis 79%	Seborrheic Keratosis 85%	Seborrheic Keratosis 72%	BKL	8	Melanoma 95%	Melanoma 95%	Melanoma 95%	MEL
9	Dysplastic Nevus 86%	Melanoma 48%		NV	9	Dysplastic Nevus 90%	Dysplastic Nevus 88%	Dysplastic Nevus 89%	NV
10	Squamous Cell Carcinoma 89%			AKIEC	10	Squamous Cell Carcinoma 46%	Squamous Cell Carcinoma 92%	Actinic Keratosisi 79%	AKIEC
11	Dysplastic Nevus 91%	Hemangioma 72%	Dysplastic Nevus 81%	NV	11	Squamous Cell Carcinoma 92%	Squamous Cell Carcinoma 93%	Squamous Cell Carcinoma 92%	AKIEC
12	Basal Cell Carcinoma 37%			BCC	12	Melanoma 89%	Benign Nevus 60%		MEL
13	Benign Nevus 47%	Benign Nevus 33%	Benign Nevus 84%	NV	13	Melanoma 95%	Melanoma 92%	Melanoma 94%	MEL
14	Dysplastic Nevus 89%	Dysplastic Nevus 40%	Dysplastic Nevus 72%	NV	14	Dysplastic Nevus 63%	Dysplastic Nevus 85%	Dysplastic Nevus 83%	NV
15	Dysplastic Nevus 89%	Dysplastic Nevus 92%	Dysplastic Nevus 56%	NV	15	Dysplastic Nevus 85%	Melanoma 79%	Melanoma 53%	NV
16	Acral nevus 89%	Acral nevus 45%	Acral nevus 92%	NV	16	Dysplastic Nevus 77%	Dysplastic Nevus 79%	Dysplastic Nevus 81%	NV
17	Dysplastic Nevus 63%	Dysplastic Nevus 85%	Dysplastic Nevus 86%	NV	17	Hemangioma 37%			VASC
18	Dysplastic Nevus 90%	Dysplastic Nevus 89%	Dysplastic Nevus 74%	NV	18	Melanoma 92%	Melanoma 79%	Melanoma 94%	MEL
19	Benign Nevus 92%	Benign Nevus 88%	Benign Nevus 68%	NV	19	Dysplastic Nevus 84%	Basal Cell Carcinoma 34%	Dysplastic Nevus 54%	NV
20	Dysplastic Nevus 90%	Dysplastic Nevus 88%	Dysplastic Nevus 91%	NV	20	Melanoma 94%	Melanoma 94%	Melanoma 87%	MEL
NV(vit-small)					MEL(vit-small)
image id	trial 1	trial 2	trial 3	predicted	image id	trial 1	trial 2	trial 3	predicted
1	Dysplastic Nevus 78%	Dysplastic Nevus 81%	Dysplastic Nevus 79%	NV	1	Dysplastic Nevus 47%	Actinic Keratosisi 51%	Lentigo 37%	AKIEC
2	Dysplastic Nevus 89%	Dysplastic Nevus 91%	Dysplastic Nevus 92%	NV	2	Dysplastic Nevus 92%	Dysplastic Nevus 94%	Dysplastic Nevus 93%	NV
3	Psoriasis Vulgaris 0.0%			NONE	3	Dysplastic Nevus 83%	Dysplastic Nevus 39%	Dysplastic Nevus 87%	NV
4	Benign Nevus 68%	Dysplastic Nevus 79%	Benign Nevus 77%	NV	4	Melanoma 93%	Melanoma 92%	Melanoma 91%	MEL
5	Dysplastic Nevus 38%	Dysplastic Nevus 62%	Benign Nevus 84%	NV	5	Dysplastic Nevus 90%	Dysplastic Nevus 91%	Dysplastic Nevus 93%	NV
6	Lentigo 89%	Melanoma 58%		BKL	6	Melanoma 93%	Melanoma 91%	Melanoma 94%	MEL
7	Melanoma 90%			MEL	7	Actinic Keratosisi 67%	Lentigo 28%	Lentigo 94%	BKL
8	Benign Nevus 92%	Benign Nevus 92%	Benign Nevus 80%	NV	8	Melanoma 95%	Melanoma 95%	Melanoma 95%	MEL
9	Dysplastic Nevus 57%	Dysplastic Nevus 68%	Dysplastic Nevus 53%	NV	9	Dysplastic Nevus 91%	Dysplastic Nevus 91%	Dysplastic Nevus 88%	NV
10	Dysplastic Nevus 63%	Dysplastic Nevus 50%	Dysplastic Nevus 60%	NV	10	Actinic Keratosisi 32%	Lentigo 36%	Actinic Keratosisi 59%	AKIEC
11	Dysplastic Nevus 90%	Dysplastic Nevus 91%	Dysplastic Nevus 92%	NV	11	Squamous Cell Carcinoma 92%	Actinic Keratosisi 91%	Squamous Cell Carcinoma 84%	AKIEC
12	Seborrheic Keratosis 47%	Basal Cell Carcinoma 41%		BKL	12	Melanoma 93%	Melanoma 93%	Melanoma 92%	MEL
13	Dysplastic Nevus 47%	Benign Nevus 92%	Benign Nevus 89%	NV	13	Melanoma 94%	Melanoma 94%	Melanoma 94%	MEL
14	Dysplastic Nevus 91%	Dysplastic Nevus 81%	Dysplastic Nevus 82%	NV	14	Melanoma 80%	Benign Nevus 74%		MEL
15	Dysplastic Nevus 92%	Dysplastic Nevus 90%	Dysplastic Nevus 92%	NV	15	Melanoma 70%	Melanoma 67%	Melanoma 71%	MEL
16	Acral nevus 93%	Acral nevus 89%	Acral nevus 91%	NV	16	Dysplastic Nevus 80%	Dysplastic Nevus 91%	Dysplastic Nevus 45%	NV
17	Dysplastic Nevus 86%	Dysplastic Nevus 89%	Dysplastic Nevus 87%	NV	17	Squamous Cell Carcinoma 45%	Squamous Cell Carcinoma 53%	Hemangioma 62%	VASC
18	Dysplastic Nevus 86%	Dysplastic Nevus 85%	Dysplastic Nevus 54%	NV	18	Melanoma 91%	Melanoma 91%	Dysplastic Nevus 35%	MEL
19	Benign Nevus 86%	Benign Nevus 60%	Benign Nevus 87%	NV	19	Dysplastic Nevus 88%	Dysplastic Nevus 86%	Dysplastic Nevus 86%	NV
20	Dysplastic Nevus 89%	Dysplastic Nevus 89%	Dysplastic Nevus 88%	NV	20	Dysplastic Nevus 89%	Melanoma 58%	Dysplastic Nevus 93%	NV
NV(efficientnet)					MEL(efficientnet)
image id	trial 1	trial 2	trial 3	predicted	image id	trial 1	trial 2	trial 3	predicted
1	Dysplastic Nevus 81%	Dysplastic Nevus 79%	Dysplastic Nevus 73%	NV	1	Dysplastic Nevus 32%	Seborrheic Keratosis 29%	Lentigo 81%	BKL
2	Dysplastic Nevus 89%	Dysplastic Nevus 91%	Dysplastic Nevus 90%	NV	2	Dysplastic Nevus 92%	Dysplastic Nevus 91%	Dysplastic Nevus 92%	NV
3	Dysplastic Nevus 85%	Dysplastic Nevus 83%	Dysplastic Nevus 83%	NV	3	Dysplastic Nevus 49%	Dysplastic Nevus 44%	Seborrheic Keratosis 71%	BKL
4	Benign Nevus 83%	Benign Nevus 86%	Benign Nevus 70%	NV	4	Melanoma 87%	Melanoma 93%	Melanoma 89%	MEL
5	Dysplastic Nevus 63%	Dysplastic Nevus 85%	Dysplastic Nevus 68%	NV	5	Dysplastic Nevus 90%	Dysplastic Nevus 90%	Dysplastic Nevus 86%	NV
6	Melanoma 55%			MEL	6	Melanoma 94%	Melanoma 93%	Melanoma 94%	MEL
7	Melanoma 92%			MEL	7	Benign Nevus 29%			NV
8	Benign Nevus 94%	Benign Nevus 73%	Benign Nevus 49%	NV	8	Melanoma 94%	Melanoma 95%	Melanoma 94%	MEL
9	Dysplastic Nevus 49%	Dysplastic Nevus 65%	Dysplastic Nevus 50%	NV	9	Dysplastic Nevus 87%	Dysplastic Nevus 84%	Actinic Keratosisi 45%	NV
10	Dysplastic Nevus 88%	Dysplastic Nevus 90%	Dysplastic Nevus 84%	NV	10	Actinic Keratosisi 91%	Actinic Keratosisi 81%	Squamous Cell Carcinoma 79%	AKIEC
11	Dysplastic Nevus 93%	Dysplastic Nevus 91%	Dysplastic Nevus 91%	NV	11	Squamous Cell Carcinoma 17%	Actinic Keratosisi 80%	Lentigo 70%	AKIEC
12	Basal Cell Carcinoma 43%			BCC	12	Benign Nevus 47%			NV
13	Benign Nevus 91%	Benign Nevus 93%	Benign Nevus 93%	NV	13	Melanoma 94%	Melanoma 94%	Melanoma 87%	MEL
14	Dysplastic Nevus 88%	Dysplastic Nevus 84%	Dysplastic Nevus 90%	NV	14	Dysplastic Nevus 68%	Dysplastic Nevus 80%	Dysplastic Nevus 84%	NV
15	Dysplastic Nevus 91%	Dysplastic Nevus 91%	Dysplastic Nevus 91%	NV	15	Lentigo 55%	Lentigo 30%	Lentigo 94%	BKL
16	Acral nevus 91%	Acral nevus 93%	Acral nevus 91%	NV	16	Dysplastic Nevus 90%	Dysplastic Nevus 93%	Dysplastic Nevus 91%	NV
17	Dysplastic Nevus 86%	Dysplastic Nevus 89%	Dysplastic Nevus 89%	NV	17	Hemangioma 60%			VASC
18	Dysplastic Nevus 89%	Dysplastic Nevus 90%	Dysplastic Nevus 89%	NV	18	Seborrheic Keratosis 61%	Seborrheic Keratosis 55%	Seborrheic Keratosis 90%	BKL
19	Benign Nevus 91%	Benign Nevus 94%	Benign Nevus 94%	NV	19	Dysplastic Nevus 77%	Dysplastic Nevus 79%	Dysplastic Nevus 72%	NV
20	Dysplastic Nevus 90%	Dysplastic Nevus 89%	Dysplastic Nevus 88%	NV	20	Dysplastic Nevus 91%	Dysplastic Nevus 91%	Dysplastic Nevus 88%	NV

## Sheet: Blemish Types
Blemish Types
NV(baseline)					MEL(baseline)
image id	trial 1	trial 2	trial 3	predicted	image id	trial 1	trial 2	trial 3	predicted
1	nv 72.4	nv 73	nv 84.1	NV	1	mel 64.9	mel 79.1	mel 78.7	MEL
2	mel 52.7	mel 64.8	mel 76.9	MEL	2	mel 69.9	mel 72.7	mel 77.4	MEL
3	nv 96.2	nv 98.2	nv 96.1	NV	3	mel 56.3	mel 66.8	mel 55.3	MEL
4	nv 55.4	nv 64.6	nv 41.7	NV	4	mel 75.9	mel 88.8	mel 66.1	MEL
5	mel 51	mel 50.8	nv 58.6	MEL	5	nv 82.4	nv 76.5	nv 93.6	NV
6	nv 48.4	nv 70.5	nv 65	NV	6	mel 66.5	mel 91.2	mel 88.9	MEL
7	mel 69.4	mel 81.8	mel 78.5	MEL	7	ak 91.3	ak 60.6	ak 96.8	AKIEC
8	nv 62.1	nv 62.4	nv 94.3	NV	8	mel 885.8	mel 89.1	mel 95.9	MEL
9	nv 89	nv 60.5	nv 55.3	NV	9	mel 90.9	mel 93.4	mel 93.8	MEL
10	nv 88.3	nv 80.4	nv 80.7	NV	10	mel 72.2	mel 61.5	mel 61.6	MEL
11	nv 97.8	nv 94.6	nv 53.3	NV	11	mel 55.3	mel 41	mel 58.7	MEL
12	nv 93.1	nv 84	nv 86.7	NV	12	mel 69	mel 59.7	mel 80.1	MEL
13	nv 60.7	nv 65.1	nv 77.9	NV	13	mel 42.8	mel 48.3	mel 61.1	MEL
14	nv 80.1	nv 77.6	nv 80.5	NV	14	mel 57.2	mel 96.2	mel 50.3	MEL
15	nv 49.2	nv 69.4	nv 61.1	NV	15	mel 77.4	mel 76	mel 73.6	MEL
16	nv 83.3	nv 77.8	nv 91.4	NV	16	mel 50.1	mel 58.6	nv 67.6	MEL
17	nv 58	nv 66.9	nv 80.5	NV	17	mel 80.3	mel 48.1	mel 83	MEL
18	nv 81	nv 87.4	nv 83.5	NV	18	mel 94.6	mel 63.6	mel 90.4	MEL
19	nv 96.5	nv 91.6	nv 89.4	NV	19	nv 67	nv 65.2	nv 65.1	NV
20	nv 90.5	nv 88.2	nv 82.4	NV	20	mel 69.1	mel 75.8	mel 71.6	MEL
NV(Res18)					MEL(Res18)
image id	trial 1	trial 2	trial 3	predicted	image id	trial 1	trial 2	trial 3	predicted
1	nv 83.7	nv 94.3	nv 91.1	NV	1	BKL 40.2			BKL
2	nv 52.6	mel 58.7		MEL	2	mel 62.5	mel 63.7	mel 72	MEL
3	nv 99	nv 97.9	nv 98.5	NV	3	mel 46.7	mel 72	mel 61.8	MEL
4	nv 72.6	nv 60.8	nv 72.6	NV	4	mel 50.1	nv 75.4		NV
5	nv 72.7	nv 65.3	nv 69.5	NV	5	nv 87.1	nv 82.1		NV
6	nv 93.6	nv 59.7	nv 90.6	NV	6	BKL 44.6			BKL
7	mel 61.7			MEL	7	AK 44.4	AK 43.6	ak 61.5	AKIEC
8	nv 75.1	nv 60.2	nv 59.1	NV	8	mel 87.9	mel 90.2	mel 92.2	MEL
9	nv 75.4	nv 68	nv 56.4	NV	9	mel 75.1	mel 53	mel 62.7	MEL
10	nv 87	nv 86.9	nv 75.8	NV	10	mel 69.6	mel 68.4	mel 72.2	MEL
11	nv 97.1	nv 67.2	nv 57	NV	11	mel 46.2	mel 51.6	mel 62.1	MEL
12	nv 62.3	nv 61	nv 82.1	NV	12	nv 68.2			NV
13	nv 76.8	nv 89.7	nv 72.4	NV	13	mel 63.4	nv 49.8		NV
14	nv 90.5	nv 91.9	nv 85.8	NV	14	nv 70.1			NV
15	nv 86.5	nv 83.2	nv 98.2	NV	15	mel 71.8	mel 80.5	mel 78.1	MEL
16	nv 87	nv 82.8	nv 77.5	NV	16	nv 78.6			NV
17	nv 93.6	nv 76.9	nv 94.6	NV	17	mel 57.4	mel 52.8	mel 45.3	MEL
18	nv 79.1	nv 93.5	nv 87.8	NV	18	mel 37.9	mel 47.6	nv 50	NV
19	nv 90.4	nv 91.3	nv 89.6	NV	19	nv 71.5			NV
20	nv 94.2	nv 96.9	nv 86	NV	20	nv 52.2			NV
NV(Res50)					MEL(Res50)
image id	trial 1	trial 2	trial 3	predicted	image id	trial 1	trial 2	trial 3	predicted
1	nv 77.6	nv 88.6	nv 73	NV	1	nv 49.5			NV
2	nv 59.5	nv 58.4	nv 54.7	NV	2	mel 45.4	nv 42.4		NV
3	nv 96	nv 85.5	nv 96.3	NV	3	mel64.9	mel 62.8	mel 70.4	MEL
4	nv 50.5	nv 47.9	nv 54.7	NV	4	mel 66.4	nv 62.7		NV
5	nv 60.5	nv 58.3	nv 60.5	NV	5	nv 69.8			NV
6	nv 79	nv 884.4	nv 72.2	NV	6	mel 58.3	mel 62	mel 61.4	MEL
7	nv 44.6	mel 58.5		MEL	7	ak 79	ak 59.7	BKL 44.8	AKIEC
8	nv 47.5	nv 45.1	nv 33.6	NV	8	mel 86.8	mel 85.7	mel 8	MEL
9	nv 75.9	nv 66.2	nv 67	NV	9	mel 73.4	mel 63.1	mel 51.7	MEL
10	nv 70.8	nv 71.3	nv 72.6	NV	10	mel 60.5	mel 68.4	mel 73.1	MEL
11	nv 73	nv 85.5	nv 83.8	NV	11	mel 41.9	mel 33	mel 44.6	MEL
12	nv 56.1	nv 63.3	nv 55.3	NV	12	nv 54.9			NV
13	nv 56.6	nv 69.7	nv 48.3	NV	13	mel 53.6	mel 64.1	mel 53	MEL
14	nv 82.5	nv 73.4	nv 64.3	NV	14	nv 77			NV
15	nv 80.9	nv 86	nv 86.7	NV	15	mel 78.5	mel 85.1	mel 84.6	MEL
16	vasc 36.7			MEL	16	nv 51			NV
17	nv 68.8	nv 66.5	nv 35.3	NV	17	mel 44	mel 40.2	mel 54.8	MEL
18	nv 69.7	nv 69	nv 54.6	NV	18	mel 64.1	mel 62.7	mel 39.4	MEL
19	nv 84.1	nv 82.8	nv 97.1	NV	19	nv 80.1			NV
20	nv 95.3	nv 96.8	nv 88.4	NV	20	nv 56.1			NV
NV(vgg16)					MEL(vgg16)
image id	trial 1	trial 2	trial 3	predicted	image id	trial 1	trial 2	trial 3	predicted
1	nv 89.4	nv 87.6	nv 81.7	NV	1	BKL 52.4			BKL
2	nv 61.3	nv62.5	nv 59.4	NV	2	mel 51.1	mel 63.1	mel 55.8	MEL
3	nv 92.4	nv 97.7	nv 94.7	NV	3	mel 64	mel 62.2	mel 70.5	MEL
4	nv 62.5	nv 77.3	nv 35.9	NV	4	mel 55.1	nv 81.8		NV
5	nv 64.7	nv 68.3	nv 54.8	NV	5	nv 72.6			NV
6	nv 76.6	nv 84.5	nv 75	NV	6	mel 37.5	mel 51.7	mel 54.5	MEL
7	mel 54			MEL	7	ak 76.2	ak 47.7	ak 51.4	AKIEC
8	nv 65.7	nv 67.2	nv 70.6	NV	8	mel 81.7	mel 91.5	mel 72.6	MEL
9	nv 71	nv 89.2	nv 84	NV	9	mel 76.8	mel 75.1	mel 74	MEL
10	nv 71.6	nv 65.1	nv 86.6	NV	10	mel 52.6	mel 58.2	mel 69.9	MEL
11	nv 81.1	nv 80.1	nv 70.8	NV	11	mel 48.7	mel 50.9	mel 57.3	MEL
12	nv 56.5	nv 73	BKL 61.3	BKL	12	nv 61			NV
13	nv 38.7	nv 72.9	nv 62.8	NV	13	mel 54.5	mel 54.3	mel 57.6	MEL
14	nv 85.1	nv 79.4	nv 83.9	NV	14	nv 69.8			NV
15	nv 89.9	nv 86.4	nv 86.7	NV	15	mel 78.3	mel 71.7	mel 70.4	MEL
16	nv 57.9	nv 61.3	nv 60.3	NV	16	nv 59.6			NV
17	nv 55.4	nv 65.9	nv 83.5	NV	17	mel 45.2	mel 70.6	mel 64.3	MEL
18	nv 72.2	nv 73.8	nv 69	NV	18	mel 56.2	mel 42.8	BKL 44.8	BKL
19	nv 81.9	nv 97.1	nv 81.9	NV	19	nv 83.7			NV
20	nv 92.7	nv 86.3	nv 95.6	NV	20	nv 64.9			NV
NV(vgg19)					MEL(vgg19)
image id	trial 1	trial 2	trial 3	predicted	image id	trial 1	trial 2	trial 3	predicted
1	nv 92.5	nv 89.4	nv 79.2	NV	1	BKL 50.9			BKL
2	nv 63.3	mel 41		MEL	2	nv 53.2			NV
3	nv 98	nv 98,8	nv 98.8	NV	3	mel 49.4	mel 65.4	mel 67.7	MEL
4	nv 65.6	nv 53.9	mel 53.9	MEL	4	nv 64.9			NV
5	nv 77	nv 83	nv 80.6	NV	5	nv 90.8			NV
6	nv 77.9	nv 75.8	nv 66.6	NV	6	BKL 40			BKL
7	mel 49.9			MEL	7	ak 34.9	mel 36.1	ak 41.9	AKIEC
8	nv 59.2	nv 61.2	nv 67.1	NV	8	mel 78.4	mel 77.2	mel 82.5	MEL
9	nv 73.6	nv 79.6	nv 56.3	NV	9	mel 57.6	mel 66.5	mel 56.9	MEL
10	nv 88.7	nv 77.5	nv 64.6	NV	10	mel 63.4	mel 61.4	mel 71.9	MEL
11	nv 82.8	nv 69.1	nv 70.1	NV	11	nv 62.6			NV
12	nv 70.8	nv 64.6	nv 66.4	NV	12	nv 81.4			NV
13	nv 79.3	nv 80.4	nv 79.4	NV	13	mel 59.2	mel 51.9	mel 49.7	MEL
14	nv 78.7	nv 80.8	nv 85.1	NV	14	nv 87.4			NV
15	nv 70	nv 70.2	nv 72.7	NV	15	mel 74.2	mel 68.2	mel 71.7	MEL
16	nv 54.7	nv 52.4	nv 60.7	NV	16	nv 63.4			NV
17	nv 71.8	nv 64.6	nv 51.2	NV	17	nv 51.2			NV
18	nv 78.2	nv 74.8	nv 71.8	NV	18	mel 46.8	mel 56.7	mel 44.5	MEL
19	nv 88.9	nv 78.6	nv 83.3	NV	19	nv 69.5			NV
20	nv 95.4	nv 87.7	nv 84.1	NV	20	nv 75.2			NV
NV(Densenet121)					MEL(densenet121)
image id	trial 1	trial 2	trial 3	predicted	image id	trial 1	trial 2	trial 3	predicted
1	nv 84	nv 87.2	nv 92.9	NV	1	BKL 55			BKL
2	mel 55.5			MEL	2	mel 50.5	mel 54.3	mel 57.2	MEL
3	nv 98.5	nv 97.7	nv 94.5	NV	3	mel 64.8	mel 46.3	ak 52.2	AKIEC
4	nv 67.4	nv 65.1	nv 65	NV	4	nv 49.7	mel 57	nv 56.3	NV
5	nv 67.8	nv 57.8	nv 69.4	NV	5	nv 85			NV
6	nv 87.8	nv 91.9	mel 42.1	MEL	6	BKL 63.4			BKL
7	mel 70.6			MEL	7	ak 58.1	ak 87.7	ak 43.2	AKIEC
8	nv 80.3	nv 54	nv 75.4	NV	8	mel 91.9	mel 77.6	mel 91.5	MEL
9	mel 59.8			NV	9	mel 71.7	mel 66.4	mel 60.1	MEL
10	nv 82.5	nv 83.8	nv 66.6	MEL	10	mel 73.8	mel 65.4	mel 58.7	MEL
11	nv 85.5	nv 81.2	nv 76.4	NV	11	mel 51.6	mel 59.4	mel 75.5	MEL
12	nv 82.5	nv 50.2	nv 67.3	NV	12	nv 72			NV
13	nv 76.7	nv 87	nv 92.4	NV	13	mel 47.5	mel 50.6	nv 49.4	NV
14	nv 93.3	nv 93.5	nv 94	NV	14	nv 77			NV
15	nv 86.4	nv 86.2	nv 98.2	NV	15	mel 64.2	mel 77.5	mel 68.7	MEL
16	nv 73.3	nv 67.7	nv 65.2	NV	16	nv 65.5			NV
17	nv 81	mel 63.4		MEL	17	mel 56.4	mel 62.2	mel 50	MEL
18	nv 84.9	nv 86.6	nv 90.6	NV	18	mel 57.3	BKL 46.5		BKL
19	nv 97.6	nv 94.4	nv 92.1	NV	19	nv 79.5			NV
20	nv 95.1	nv 96.6	nv 94.1	NV	20	nv 70.6			NV
NV(Densenet201)					MEL(densenet201)
image id	trial 1	trial 2	trial 3	predicted	image id	trial 1	trial 2	trial 3	predicted
1	nv 92	nv 82.3	nv 85.1	NV	1	BKL 71.1			BKL
2	nv 57.3	nv 53	nv 72.6	NV	2	NV 52.5			NV
3	nv 97.9	nv 98.6	nv 90.8	NV	3	mel 51.2	mel 58.2	mel 57.1	MEL
4	nv 56.5	nv 65	nv 80.6	NV	4	mel 64.5	nv 55.9		NV
5	nv 68.7	nv 79.8	nv 74.7	NV	5	nv 92.3			NV
6	nv 81.1	nv 76.8	nv 74.9	NV	6	BKL 46			BKL
7	mel 65.1			MEL	7	ak 68.4	ak 62.3	ak 83.7	AKIEC
8	nv 59.3	nv 78.2	nv 64.6	NV	8	mel 82.8	mel 96.1	mel 95.7	MEL
9	nv 91	nv 61.2	nv 81.5	NV	9	mel 54.5	mel 63.9	mel 73.1	MEL
10	nv 75.5	nv 78.7	nv 79.9	NV	10	mel 53.6	mel 50.8	mel 70.6	MEL
11	nv 92.7	nv 80.6	nv 71.1	NV	11	nv 50.1			NV
12	nv 82.9	nv 67.6	nv 70.3	NV	12	nv 60.3			NV
13	nv 77.9	nv 85.2	nv 91.6	NV	13	mel 73.1	nv 58		NV
14	nv 84.4	nv 88.3	nv 82.1	NV	14	nv 78.8			NV
15	nv 90.9	nv 88.8	nv 73.8	NV	15	mel 74.1	mel 86.3	mel 73.5	MEL
16	nv 65.9	nv 69.2	nv 60.6	NV	16	nv 88.1			NV
17	nv 90.2	nv 84.9	nv 60.3	NV	17	mel 83	mel 56	mel 59.6	MEL
18	nv 80.6	nv 80.1	nv 72.3	NV	18	mel 53.6	mel 46.8	mel 54.3	MEL
19	nv 97.9	nv 96.9	nv 92.3	NV	19	nv 80.1			NV
20	nv 97.9	nv 97.1	nv 98.5	NV	20	nv 68.1			NV
NV(mobilenetv2)					MEL(mobilenetv2)
image id	trial 1	trial 2	trial 3	predicted	image id	trial 1	trial 2	trial 3	predicted
1	nv 97	nv 95.7	nv 86.2	NV	1	mel 47.6	mel 47.4	mel 53.7	MEL
2	nv 52.1	nv 44.2	nv 40.2	NV	2	mel 50	mel 53.9	mel 58.7	MEL
3	nv 98.9	nv 99	nv 98	NV	3	mel 61.3	mel 58.4	mel 54.4	MEL
4	nv 72.4	nv 50.9	nv 80.2	NV	4	nv 56.8			NV
5	nv 77	nv 65.6	nv 60.5	NV	5	nv 85.4			NV
6	nv 85	nv 78.9	nv 61.7	NV	6	nv 66.3			NV
7	nv 50.8	mel 75.1		MEL	7	ak 74.6	ak 62.8	ak 67	AKIEC
8	nv 79.5	nv 81.8	nv 69.7	NV	8	mel 91.4	mel 71.7	mel 88.1	MEL
9	nv 76.5	nv 52.2	nv 71.1	NV	9	mel 53.4	mel 60	mel 60.4	MEL
10	nv 79.9	nv 82.7	nv 87	NV	10	mel 64	mel 62.7	mel 61.5	MEL
11	nv 90.7	nv 85.3	nv 94.1	NV	11	mel 51.3	nv 44		NV
12	nv 58.8	nv 72.5	nv 58.1	NV	12	nv 51.6			NV
13	nv 68.5	nv 78.9	nv 81.6	NV	13	mel 68.2	mel 69.6	mel 58.4	MEL
14	nv 84.4	nv 91.1	nv 69.8	NV	14	nv 75.3			NV
15	nv 65.8	nv 72.2	nv 64.9	NV	15	mel 73	mel 82.8	mel 81.7	MEL
16	nv 77.5	nv 85.5	nv 85.5	NV	16	nv 62.2			NV
17	nv 59.5	nv 81.6	nv 80.5	NV	17	mel 47.3	mel 54.3	mel 49	MEL
18	nv 86.2	nv 76.6	nv 84.2	NV	18	mel 40.6	mel 55.7	mel 74	MEL
19	nv 93.3	nv 82.4	nv 82.5	NV	19	nv 86.2			NV
20	nv 94.9	nv 82.9	nv 84.2	NV	20	nv 69.6			NV
NV(mobilenetv3)					MEL(mobilenetv3)
image id	trial 1	trial 2	trial 3	predicted	image id	trial 1	trial 2	trial 3	predicted
1	nv 72.3	nv 93.9	nv 96.1	NV	1	BKL 52.5			BKL
2	nv 48.2	nv 65	nv 54.4	NV	2	mel 54.3	mel 49.9	nv 51.3	NV
3	nv 98.8	nv 99.3	nv 98.9	NV	3	mel 54.6	mel 54.6	mel 45	MEL
4	nv 68.6	nv 69.9	nv 71.4	NV	4	mel 53.3	nv 74.1		NV
5	nv 64	nv 66.8	nv 87.8	NV	5	nv 83			NV
6	nv 92	nv 93.3	nv 90.5	NV	6	BCC 47.8	mel 53.9	mel 43.7	BCC
7	mel 71.3			MEL	7	mel 33.7	ak 34.9	mel 36.2	MEL
8	nv 83.3	nv 78	nv 74.8	NV	8	mel 88.1	mel 88.7	mel 67.8	MEL
9	mel 57.8			MEL	9	nv 65.1	mel 49.6	nv 49.1	NV
10	nv 71.1	nv 91.8	nv 65.4	NV	10	mel 70.5	mel 549.8	mel 58.6	MEL
11	nv 61.8	nv 89.2	nv 70	NV	11	mel 52.9	nv 45.4		NV
12	nv 59.7	nv 81.7	nv 75.5	NV	12	nv 79.3			NV
13	nv 95.8	nv 74.4	nv 89.2	NV	13	mel 51.5	mel 56.7	mel 62.8	MEL
14	nv 90.4	nv 85.6	nv 83.5	NV	14	nv 92			NV
15	nv 88.2	nv 97.3	nv 87.4	NV	15	mel 75.1	mel 78.7	mel 71.6	MEL
16	nv 74.3	nv 90.1	nv 76.5	NV	16	nv 58.9			NV
17	nv 92	nv 54.9	nv 64.3	NV	17	mel 62.5	mel 47.2	mel 51.2	MEL
18	nv 92	nv 90.2	nv 87.9	NV	18	mel 47.8	mel 50.9	mel 66.3	MEL
19	nv 93	nv 92.9	nv 97	NV	19	nv 81.5			NV
20	nv 92.7	nv 79.6	nv 90.9	NV	20	nv 49.4			NV
NV(vit-base)					MEL(vit-base)
image id	trial 1	trial 2	trial 3	predicted	image id	trial 1	trial 2	trial 3	predicted
1	nv 75.6	nv 88.9	nv 92.6	NV	1	BKL 43.1			BKL
2	nv 52.2	nv 52.9	mel 48.7	MEL	2	mel 68.2	mel 56.7	mel 61.8	MEL
3	nv 95.1	nv 85.5	nv 95	NV	3	mel 67.5	mel 69	mel 60.3	MEL
4	nv 64	nv 60.4	nv 55.6	NV	4	nv 68.4			NV
5	nv 50.8	nv 54.9	nv 50.5	NV	5	nv 88.6			NV
6	nv 84.9	nv 70.6	nv 77.2	NV	6	mel 48.6	mel 50.2	BCC 36.7	BCC
7	mel 69.5			MEL	7	ak 60.5	ak 39.6	ak 59.2	AKIEC
8	nv 54	nv 47.7	nv 52	NV	8	mel 69.3	mel 69.3	mel 77.4	MEL
9	nv 70.7	mel 66.3		MEL	9	mel 64.9	mel 59.9	mel 52.8	MEL
10	nv 58.8	nv 64.3	nv 71.2	NV	10	mel 58.5	mel 63.7	mel 60.5	MEL
11	nv 64	nv 72.3	nv 63.7	NV	11	nv 51.3			NV
12	nv 88.2	nv 78.1	nv 63.3	NV	12	nv 58.5			NV
13	nv 67.3	nv 72.5	nv 68.2	NV	13	mel 62.6	mel 57.9	mel 36.8	MEL
14	nv 92.8	nv 85.6	nv 94.3	NV	14	nv 80.9			NV
15	nv 91.5	nv 85.6	nv 89.8	NV	15	mel 63.8	mel 63.8	mel 66.4	MEL
16	nv 62	nv 65	nv 64	NV	16	nv 72.9			NV
17	nv 81.3	nv 59.4	nv 74	NV	17	mel 63.3	mel 67.4	mel 47.9	MEL
18	nv 81.2	nv 66.2	nv 67.9	NV	18	BKL 49.6			BKL
19	nv 79.6	nv 91.5	nv 94.5	NV	19	nv 74.6			NV
20	nv 89.8	nv 91.2	nv 89.2	NV	20	nv 70.1			NV
NV(vit-small)					MEL(vit-small)
image id	trial 1	trial 2	trial 3	predicted	image id	trial 1	trial 2	trial 3	predicted
1	nv 90.2	nv 80.2	nv 85.7	NV	1	nv 39.3			NV
2	nv 58.8	nv 55.4	nv 63.2	NV	2	mel 51.3	mel 48.2	nv 52	NV
3	nv 97.7	nv 93.3	nv 97.6	NV	3	mel 65	mel 60.4	mel 59.4	MEL
4	nv 53.1	nv 36	nv 50.6	NV	4	nv 52.4			NV
5	nv 59	mel 50.4		MEL	5	nv 90			NV
6	nv 71.9	nv 69.5	nv 65.6	NV	6	mel 442.2	mel 53.5	BKL 59	BKL
7	mel 64.4			MEL	7	ak 44.6	ak 75.4	ak 80.2	AKIEC
8	nv 77.2	nv 67.9	mel 51.1	MEL	8	mel 77.3	mel 69.3	mel 88.1	MEL
9	nv 84.7	nv 73	nv 84	NV	9	mel 56.5	nv 53.1		NV
10	nv 88.1	nv 61.1	nv 74	NV	10	mel 56.1	mel 75.5	mel 53.4	MEL
11	nv 77.4	nv 56.7	nv 63.9	NV	11	mel 45.8	mel 55.5	mel 43	MEL
12	BKL 49.8	nv 69.4	nv 63.9	NV	12	nv 68.2			NV
13	nv 63.1	nv 83.3	nv 59.1	NV	13	mel 45.7	mel 64.3	mel 67.1	MEL
14	nv 84.5	nv 80.3	nv 83.7	NV	14	nv 80.1			NV
15	nv 88.9	nv 80.3	nv 78.4	NV	15	mel 56.7	mel 71.4	mel 65	MEL
16	nv 57.6	nv 65	nv 83.8	NV	16	nv 78.2			NV
17	nv 76.7	nv 89.3	nv 84	NV	17	mel 44.7	mel 65.7	mel 42.1	MEL
18	nv 82.4	nv 69.4	nv 84.4	NV	18	BKL 45.5			BKL
19	nv 94.9	nv 94.1	nv 89.5	NV	19	nv 88.5			NV
20	nv 82.4	nv 88.2	nv 80.9	NV	20	nv 75.9			NV
NV(efficientnet)					MEL(efficientnet)
image id	trial 1	trial 2	trial 3	predicted	image id	trial 1	trial 2	trial 3	predicted
1	nv 90.2	nv 86.6	nv 87.2	NV	1	BKL 55.7			BKL
2	nv 63.7	nv 50.7	nv 54.1	NV	2	nv 47.1			NV
3	nv 99.2	nv 99.2	nv 93.1	NV	3	mel 54.9	mel 75.6	ak 47.3	AKIEC
4	mel 59.3			MEL	4	nv 63.6			NV
5	nv 72.3	nv 51.2	nv 77.8	NV	5	nv 92.6			NV
6	nv 85.9	nv 60.4	nv 54.8	NV	6	mel 51.3	mel 50	BKL 63.3	BKL
7	nv 49.2	mel 57		MEL	7	ak 38.3	ak 48.1	BKL 35.2	AKIEC
8	nv 73.3	nv 61.5	nv 69.6	NV	8	mel 77.2	mel 58.3	mel 81	MEL
9	nv 71.2	mel 60.4		MEL	9	mel 54.2	mel 57.2	mel 63.5	MEL
10	nv 59.6	nv 62.3	nv 76.7	NV	10	mel 67.5	mel 61.7	mel 57.3	MEL
11	nv 67.3	nv 91.5	nv 76.4	NV	11	nv 61			NV
12	nv 73.2	nv 84.2	nv 85.6	NV	12	nv 72.5			NV
13	nv 79.2	nv 78.7	nv 67.4	NV	13	mel 53.1	mel 54.3	mel 62.5	MEL
14	nv 92	nv 90.3	nv 87.9	NV	14	nv 86.1			NV
15	nv 92.1	nv 91.8	nv 87.1	NV	15	mel 71.1	mel 58.1	mel 77.2	MEL
16	nv 83.1	nv 82.9	nv 60.8	NV	16	nv 73.7			NV
17	nv 80.5	nv 58.2	nv 87.4	NV	17	mel 41.7	mel 62.1	mel 47.8	MEL
18	nv 81.9	nv 76	nv 81	NV	18	mel 62.8	BKL 40.4		BKL
19	nv 85.6	nv 89.1	nv 88.8	NV	19	nv 85.5			NV
20	nv 96.2	nv 96.3	nv 79.2	NV	20	nv 59.7			NV
